# Supplementary material for: Interrogating Type 2 Diabetes Genome-Wide Association Data Using a Biological Pathway-Based Approach
Source: PubMed Central journal article supplement — Diabetes. 2009 Feb 27;58(6):1463–7. doi: 10.2337/db08-1378 (PMC2682674; doi:10.2337/db08-1378), 2009-02-27
Supplement: supp_db08-1378_OnlineAppendixdb081378.pdf [file supp_db08-1378_OnlineAppendixdb081378.pdf]

**Supplementary table 1** – Three Study results for all 126 SNPs in WNT-signalling pathway

| Gene            | SNP        | Chr | Pos       | Risk allele | Risk Freq | WTCCC OR         | WTCCC P | Replication OR   | Replication P | 3Study OR        | 3Study P |
|-----------------|------------|-----|-----------|-------------|-----------|------------------|---------|------------------|---------------|------------------|----------|
| <i>DKK2</i>     | rs10028834 | 4   | 108211197 | T           | 0.08      | 1.22 (1.05-1.43) | 0.01    | 1.11 (0.95-1.29) | 0.19          | 1.16 (1.04-1.3)  | 0.007    |
| <i>CAMK2A</i>   | rs10066581 | 5   | 149595874 | G           | 0.86      | 1.13 (1.01-1.27) | 0.03    | 1.04 (0.91-1.17) | 0.59          | 1.09 (1-1.18)    | 0.05     |
| <i>NKD2</i>     | rs10071261 | 5   | 1066694   | T           | 0.11      | 1.1 (0.96-1.26)  | 0.17    | 1.03 (0.9-1.18)  | 0.63          | 1.07 (0.97-1.17) | 0.19     |
| <i>RAC1</i>     | rs10234438 | 7   | 6196040   | A           | 0.97      | 1.27 (1-1.6)     | 0.05    | 0.95 (0.76-1.19) | 0.65          | 1.09 (0.92-1.28) | 0.31     |
| <i>PPP3CB</i>   | rs1041532  | 10  | 74877493  | T           | 0.06      | 0.98 (0.83-1.17) | 0.85    | 1.07 (0.89-1.28) | 0.47          | 1.02 (0.9-1.16)  | 0.72     |
| <i>SMAD4</i>    | rs10502913 | 18  | 46822269  | G           | 0.77      | 1.06 (0.96-1.16) | 0.27    | 1.06 (0.97-1.16) | 0.23          | 1.06 (0.99-1.13) | 0.10     |
| <i>WNT7A</i>    | rs1077524  | 3   | 13905134  | C           | 0.36      | 1.09 (1-1.18)    | 0.06    | 0.99 (0.91-1.08) | 0.85          | 1.04 (0.98-1.1)  | 0.23     |
| <i>FZD4</i>     | rs10898552 | 11  | 86296526  | T           | 0.7       | 1.09 (1-1.2)     | 0.05    | 0.97 (0.88-1.08) | 0.60          | 1.04 (0.97-1.11) | 0.24     |
| <i>FZD8</i>     | rs11010252 | 10  | 35987557  | T           | 0.09      | 1.16 (1-1.35)    | 0.05    | 0.86 (0.73-1.01) | 0.06          | 1.01 (0.9-1.12)  | 0.89     |
| <i>PLCB2</i>    | rs11070264 | 15  | 38399153  | T           | 0.93      | 1.13 (0.97-1.32) | 0.13    | 1 (0.86-1.15)    | 0.97          | 1.06 (0.95-1.17) | 0.32     |
| <i>PRKACB</i>   | rs11163905 | 1   | 84306420  | G           | 0.46      | 1.12 (1.03-1.22) | 0.006   | 1 (0.92-1.09)    | 0.97          | 1.06 (1-1.12)    | 0.05     |
| <i>FRAT1</i>    | rs11189119 | 10  | 99057279  | T           | 0.1       | 1.17 (1.01-1.35) | 0.03    | 1 (0.87-1.15)    | 0.98          | 1.08 (0.98-1.19) | 0.13     |
| <i>MAP3K7</i>   | rs1145721  | 6   | 91225674  | G           | 0.36      | 1.12 (1.03-1.22) | 0.010   | 1 (0.92-1.09)    | 0.97          | 1.06 (1-1.12)    | 0.07     |
| <i>WNT3A</i>    | rs11589040 | 1   | 224495280 | A           | 0.91      | 1.16 (1.01-1.33) | 0.04    | 1.06 (0.93-1.2)  | 0.40          | 1.1 (1-1.21)     | 0.04     |
| <i>PPP2R1B</i>  | rs11601674 | 11  | 111139564 | T           | 0.74      | 1.06 (0.97-1.17) | 0.19    | 1.01 (0.92-1.1)  | 0.85          | 1.04 (0.97-1.1)  | 0.29     |
| <i>SFRP2</i>    | rs11732581 | 4   | 155077843 | C           | 0.96      | 1.33 (1.09-1.62) | 0.004   | 1.15 (0.84-1.56) | 0.39          | 1.28 (1.08-1.51) | 0.004    |
| <i>CCND2</i>    | rs11833537 | 12  | 4150368   | C           | 0.41      | 1.12 (1.03-1.22) | 0.008   | 1.06 (0.98-1.15) | 0.13          | 1.09 (1.03-1.16) | 0.003    |
| <i>DKK1</i>     | rs1194742  | 10  | 53883556  | G           | 0.05      | 1.19 (0.98-1.45) | 0.08    | 1.31 (1.07-1.59) | 0.008         | 1.25 (1.09-1.44) | 0.002    |
| <i>CCND3</i>    | rs11970772 | 6   | 42033268  | T           | 0.8       | 1.12 (1.01-1.23) | 0.03    | 0.97 (0.89-1.07) | 0.59          | 1.04 (0.97-1.11) | 0.30     |
| <i>VANGL2</i>   | rs12090877 | 1   | 157189133 | C           | 0.92      | 1.2 (1.03-1.39)  | 0.02    | 1.03 (0.9-1.17)  | 0.68          | 1.1 (1-1.21)     | 0.06     |
| <i>CTNNBIP1</i> | rs12128766 | 1   | 9871307   | C           | 0.52      | 1.05 (0.96-1.13) | 0.28    | 1.02 (0.94-1.11) | 0.61          | 1.04 (0.98-1.1)  | 0.26     |
| <i>LRP6</i>     | rs12425946 | 12  | 12302231  | G           | 0.85      | 1.14 (1.02-1.28) | 0.02    | 1.01 (0.9-1.14)  | 0.89          | 1.08 (0.99-1.17) | 0.08     |
| <i>CTBP1</i>    | rs1250108  | 4   | 1218924   | G           | 0.44      | 1.1 (1.02-1.2)   | 0.02    | 1.02 (0.94-1.11) | 0.69          | 1.06 (1-1.12)    | 0.05     |
| <i>PPP3CC</i>   | rs12545909 | 8   | 22365997  | G           | 0.55      | 1.04 (0.96-1.13) | 0.37    | 1 (0.92-1.08)    | 0.98          | 1.02 (0.96-1.08) | 0.52     |
| <i>NFATC4</i>   | rs12590407 | 14  | 23904955  | A           | 0.71      | 1.06 (0.97-1.16) | 0.22    | 1.04 (0.95-1.13) | 0.44          | 1.05 (0.98-1.11) | 0.16     |
| <i>NFATC3</i>   | rs12597573 | 16  | 66725022  | C           | 0.89      | 1.02 (0.89-1.15) | 0.82    | 1.01 (0.91-1.14) | 0.81          | 1.01 (0.93-1.1)  | 0.74     |

|                 |            |    |           |   |      |                  |       |                  |       |                  |       |
|-----------------|------------|----|-----------|---|------|------------------|-------|------------------|-------|------------------|-------|
| <i>FZD5</i>     | rs12694091 | 2  | 208467450 | T | 0.14 | 1.05 (0.93-1.18) | 0.44  | 1.05 (0.91-1.21) | 0.53  | 1.05 (0.96-1.15) | 0.33  |
| <i>WNT8B</i>    | rs12762598 | 10 | 102217746 | C | 0.32 | 1.03 (0.94-1.12) | 0.51  | 0.98 (0.89-1.07) | 0.58  | 1 (0.94-1.07)    | 0.94  |
| <i>CREBBP</i>   | rs130005   | 16 | 3768349   | G | 0.11 | 0.92 (0.81-1.05) | 0.23  | 1.18 (1.04-1.34) | 0.009 | 1.05 (0.96-1.15) | 0.31  |
| <i>ROCK1</i>    | rs1318841  | 18 | 17138521  | A | 0.04 | 1.29 (1.04-1.61) | 0.02  | 1.05 (0.79-1.41) | 0.73  | 1.2 (1.01-1.43)  | 0.04  |
| <i>RUVBL1</i>   | rs1554534  | 3  | 129282367 | T | 0.86 | 1.02 (0.91-1.15) | 0.69  | 1.06 (0.96-1.18) | 0.26  | 1.04 (0.97-1.13) | 0.27  |
| <i>FZD3</i>     | rs164658   | 8  | 28497485  | A | 0.31 | 1.1 (1.01-1.2)   | 0.04  | 1.06 (0.98-1.16) | 0.16  | 1.08 (1.02-1.15) | 0.01  |
| <i>CER1</i>     | rs16932212 | 9  | 14716000  | C | 0.96 | 0.85 (0.68-1.07) | 0.17  | 1.51 (1.15-2)    | 0.003 | 1.08 (0.9-1.28)  | 0.41  |
| <i>NFAT5</i>    | rs16959025 | 16 | 68253090  | T | 0.84 | 1.11 (0.99-1.24) | 0.07  | 1.11 (1-1.24)    | 0.05  | 1.11 (1.03-1.2)  | 0.008 |
| <i>MMP7</i>     | rs17098236 | 11 | 101892901 | T | 0.1  | 1.23 (1.07-1.42) | 0.005 | 1.03 (0.86-1.24) | 0.77  | 1.15 (1.03-1.29) | 0.01  |
| <i>WNT2</i>     | rs17139625 | 7  | 116529429 | G | 0.92 | 1.12 (0.97-1.29) | 0.13  | 1.01 (0.88-1.15) | 0.95  | 1.06 (0.96-1.17) | 0.28  |
| <i>FZD1</i>     | rs17163799 | 7  | 90590566  | G | 0.72 | 1.12 (1.02-1.22) | 0.02  | 0.97 (0.88-1.06) | 0.49  | 1.04 (0.98-1.11) | 0.22  |
| <i>PRKACG</i>   | rs17408309 | 9  | 68861819  | T | 0.98 | 1.13 (0.83-1.55) | 0.43  | 1.01 (0.71-1.45) | 0.95  | 1.08 (0.85-1.37) | 0.53  |
| <i>MAPK9</i>    | rs17627880 | 5  | 179626784 | C | 0.79 | 1.08 (0.98-1.2)  | 0.12  | 0.97 (0.88-1.07) | 0.57  | 1.02 (0.96-1.1)  | 0.51  |
| <i>PRKCA</i>    | rs17643302 | 17 | 62201284  | T | 0.11 | 1.19 (1.04-1.36) | 0.01  | 0.87 (0.77-0.99) | 0.04  | 1.01 (0.92-1.1)  | 0.88  |
| <i>MAPK8</i>    | rs17697885 | 10 | 49239736  | T | 0.12 | 1.14 (1-1.3)     | 0.05  | 1.02 (0.9-1.15)  | 0.82  | 1.07 (0.98-1.17) | 0.12  |
| <i>CHD8</i>     | rs17792659 | 14 | 20952489  | G | 0.86 | 1.12 (1-1.26)    | 0.05  | 0.94 (0.84-1.05) | 0.25  | 1.02 (0.94-1.11) | 0.60  |
| <i>SMAD2</i>    | rs17815568 | 18 | 43729855  | C | 0.97 | 1.24 (1-1.55)    | 0.05  | 1.08 (0.82-1.42) | 0.58  | 1.18 (0.99-1.4)  | 0.06  |
| <i>SIAH1</i>    | rs17825174 | 16 | 46981974  | A | 0.07 | 1.1 (0.94-1.3)   | 0.24  | 0.99 (0.84-1.18) | 0.93  | 1.05 (0.93-1.18) | 0.43  |
| <i>PRICKLE1</i> | rs1796390  | 12 | 41164871  | T | 0.28 | 1.15 (1.05-1.26) | 0.003 | 1.08 (0.98-1.18) | 0.11  | 1.11 (1.04-1.19) | 0.001 |
| <i>WNT3</i>     | rs199496   | 17 | 42221887  | G | 0.92 | 1.1 (0.95-1.26)  | 0.22  | 0.96 (0.82-1.13) | 0.64  | 1.03 (0.93-1.15) | 0.54  |
| <i>DKK4</i>     | rs2073664  | 8  | 42350943  | G | 0.94 | 1.01 (0.85-1.19) | 0.92  | 1.01 (0.89-1.15) | 0.86  | 1.01 (0.91-1.12) | 0.84  |
| <i>WNT5B</i>    | rs2270037  | 12 | 1620102   | T | 0.29 | 1.09 (0.99-1.19) | 0.07  | 1 (0.91-1.1)     | 1.00  | 1.04 (0.98-1.11) | 0.20  |
| <i>WNT2B</i>    | rs2273368  | 1  | 112775813 | C | 0.82 | 1.18 (1.06-1.31) | 0.002 | 1.05 (0.96-1.15) | 0.30  | 1.1 (1.03-1.18)  | 0.005 |
| <i>WNT9B</i>    | rs2277614  | 17 | 42325945  | G | 0.98 | 1.09 (0.84-1.43) | 0.50  | 1.04 (0.79-1.39) | 0.77  | 1.07 (0.88-1.3)  | 0.49  |
| <i>WNT10A</i>   | rs2385199  | 2  | 219576251 | G | 0.19 | 0.98 (0.89-1.09) | 0.75  | 1.06 (0.95-1.18) | 0.29  | 1.02 (0.95-1.1)  | 0.60  |
| <i>CSNK2A2</i>  | rs2550380  | 16 | 56813871  | C | 0.26 | 1.14 (1.03-1.25) | 0.007 | 1.08 (0.97-1.2)  | 0.15  | 1.11 (1.04-1.19) | 0.003 |
| <i>SOX17</i>    | rs2656272  | 8  | 55424453  | A | 0.4  | 1.15 (1.06-1.25) | 0.001 | 1.05 (0.97-1.14) | 0.25  | 1.1 (1.04-1.17)  | 0.002 |
| <i>CAMK2G</i>   | rs2664280  | 10 | 75287350  | T | 0.56 | 1.08 (0.99-1.17) | 0.08  | 1.06 (0.98-1.15) | 0.17  | 1.07 (1.01-1.13) | 0.03  |
| <i>WNT16</i>    | rs2707469  | 7  | 120570837 | G | 0.17 | 0.98 (0.88-1.1)  | 0.75  | 1.08 (0.97-1.2)  | 0.16  | 1.03 (0.96-1.11) | 0.42  |
| <i>CSNK2B</i>   | rs2844463  | 6  | 31723146  | A | 0.11 | 1.01 (0.89-1.15) | 0.84  | 1.08 (0.94-1.24) | 0.29  | 1.04 (0.95-1.15) | 0.39  |

|                |           |    |           |   |      |                  |         |                  |         |                  |          |
|----------------|-----------|----|-----------|---|------|------------------|---------|------------------|---------|------------------|----------|
| <i>TP53</i>    | rs2909430 | 17 | 7519370   | C | 0.12 | 1.04 (0.91-1.18) | 0.60    | 1.07 (0.94-1.22) | 0.29    | 1.05 (0.96-1.15) | 0.26     |
| <i>PPP2R2B</i> | rs3096085 | 5  | 146026611 | G | 0.04 | 1.31 (1.06-1.62) | 0.01    | 1.11 (0.83-1.49) | 0.47    | 1.24 (1.05-1.47) | 0.01     |
| <i>FBXW11</i>  | rs33830   | 5  | 171080775 | A | 0.36 | 1.11 (1.02-1.21) | 0.02    | 1.09 (1-1.2)     | 0.05    | 1.1 (1.03-1.17)  | 0.003    |
| <i>CSNK1A1</i> | rs353249  | 5  | 148804949 | T | 0.91 | 1.17 (1.02-1.35) | 0.02    | 1.04 (0.9-1.21)  | 0.58    | 1.11 (1-1.23)    | 0.04     |
| <i>PSEN1</i>   | rs362340  | 14 | 72708891  | G | 0.1  | 1.13 (0.98-1.3)  | 0.09    | 1.04 (0.87-1.23) | 0.68    | 1.09 (0.98-1.22) | 0.12     |
| <i>FZD10</i>   | rs3741571 | 12 | 129161657 | T | 0.06 | 1.35 (1.12-1.62) | 0.001   | 1.12 (0.95-1.33) | 0.18    | 1.22 (1.08-1.38) | 0.002    |
| <i>WNT10B</i>  | rs3782353 | 12 | 47645147  | A | 0.39 | 1.04 (0.96-1.13) | 0.35    | 0.98 (0.9-1.06)  | 0.60    | 1.01 (0.95-1.07) | 0.77     |
| <i>SFRP4</i>   | rs3807612 | 7  | 37731011  | G | 0.25 | 1.08 (0.98-1.19) | 0.12    | 1.01 (0.92-1.11) | 0.88    | 1.04 (0.98-1.12) | 0.21     |
| <i>CAMK2B</i>  | rs3934888 | 7  | 44107093  | G | 0.4  | 1.02 (0.94-1.11) | 0.69    | 1.09 (1-1.18)    | 0.05    | 1.05 (0.99-1.11) | 0.09     |
| <i>FZD2</i>    | rs4098686 | 17 | 39985263  | C | 0.76 | 1.08 (0.98-1.18) | 0.12    | 1.05 (0.95-1.16) | 0.34    | 1.06 (0.99-1.14) | 0.08     |
| <i>NLK</i>     | rs4239211 | 17 | 23333545  | G | 0.28 | 1.07 (0.98-1.18) | 0.13    | 0.99 (0.91-1.08) | 0.84    | 1.03 (0.97-1.1)  | 0.36     |
| <i>PPP2R2C</i> | rs4272078 | 4  | 6487456   | T | 0.09 | 1.18 (1.02-1.38) | 0.03    | 1.05 (0.89-1.25) | 0.57    | 1.12 (1-1.26)    | 0.04     |
| <i>APC</i>     | rs4365835 | 5  | 111977339 | C | 0.34 | 1.13 (1.03-1.23) | 0.008   | 0.91 (0.83-1.01) | 0.07    | 1.03 (0.96-1.09) | 0.46     |
| <i>BTRC</i>    | rs4436485 | 10 | 103235351 | G | 0.63 | 1.11 (1.02-1.2)  | 0.02    | 1.08 (0.99-1.17) | 0.09    | 1.09 (1.03-1.16) | 0.004    |
| <i>CTNNB1</i>  | rs4459874 | 3  | 41041225  | A | 0.79 | 1.16 (1.05-1.28) | 0.003   | 0.98 (0.89-1.08) | 0.64    | 1.06 (0.99-1.14) | 0.09     |
| <i>PLCB1</i>   | rs4496390 | 20 | 8709068   | A | 0.38 | 1.1 (1.01-1.2)   | 0.03    | 0.93 (0.86-1.01) | 0.09    | 1.01 (0.95-1.07) | 0.70     |
| <i>TCF7L2</i>  | rs4506565 | 10 | 114746031 | T | 0.39 | 1.36 (1.25-1.48) | 5.7E-13 | 1.3 (1.19-1.43)  | 2.4E-08 | 1.34 (1.26-1.42) | 4.48E-19 |
| <i>WNT5A</i>   | rs460001  | 3  | 55281493  | A | 0.67 | 1.08 (0.99-1.18) | 0.07    | 0.98 (0.9-1.06)  | 0.62    | 1.03 (0.97-1.09) | 0.37     |
| <i>WNT4</i>    | rs4654792 | 1  | 22345978  | G | 0.78 | 1.18 (1.07-1.3)  | 0.001   | 0.99 (0.9-1.08)  | 0.76    | 1.07 (1-1.15)    | 0.04     |
| <i>ROCK2</i>   | rs4668722 | 2  | 11460078  | A | 0.86 | 1.08 (0.96-1.21) | 0.20    | 1.02 (0.9-1.16)  | 0.76    | 1.05 (0.97-1.15) | 0.25     |
| <i>MYC</i>     | rs4733739 | 8  | 128647197 | T | 0.8  | 1.11 (1-1.22)    | 0.05    | 0.98 (0.88-1.08) | 0.65    | 1.04 (0.97-1.12) | 0.28     |
| <i>RBX1</i>    | rs4821981 | 22 | 39740144  | G | 0.61 | 1.05 (0.97-1.14) | 0.24    | 0.99 (0.91-1.07) | 0.72    | 1.02 (0.96-1.08) | 0.57     |
| <i>EP300</i>   | rs4822012 | 22 | 39875539  | A | 0.64 | 1.06 (0.97-1.15) | 0.19    | 1.03 (0.94-1.12) | 0.59    | 1.04 (0.98-1.11) | 0.18     |
| <i>VANGL1</i>  | rs4839469 | 1  | 115918465 | G | 0.86 | 1.16 (1.03-1.3)  | 0.01    | 0.9 (0.8-1.01)   | 0.09    | 1.03 (0.95-1.11) | 0.55     |
| <i>CXXC4</i>   | rs488076  | 4  | 105873027 | A | 0.36 | 1.13 (1.04-1.23) | 0.005   | 1.01 (0.92-1.11) | 0.84    | 1.07 (1.01-1.14) | 0.03     |
| <i>SFRP5</i>   | rs4919146 | 10 | 99560323  | A | 0.47 | 1.06 (0.98-1.15) | 0.13    | 1.03 (0.95-1.12) | 0.44    | 1.05 (0.99-1.11) | 0.11     |
| <i>LEF1</i>    | rs4956041 | 4  | 109471518 | T | 0.6  | 1.11 (1.02-1.21) | 0.01    | 1.04 (0.96-1.13) | 0.32    | 1.07 (1.01-1.14) | 0.02     |
| <i>RAC2</i>    | rs6000632 | 22 | 35968615  | T | 0.25 | 0.96 (0.87-1.05) | 0.36    | 1.05 (0.95-1.16) | 0.34    | 1 (0.94-1.07)    | 1.00     |
| <i>NFATC2</i>  | rs6123004 | 20 | 49311277  | G | 0.88 | 1.21 (1.07-1.37) | 0.002   | 1 (0.9-1.13)     | 0.95    | 1.1 (1.01-1.19)  | 0.03     |
| <i>PLCB4</i>   | rs6140908 | 20 | 9204439   | G | 0.05 | 1.36 (1.11-1.66) | 0.002   | 1.04 (0.86-1.27) | 0.69    | 1.18 (1.03-1.36) | 0.02     |

|                 |           |    |           |   |      |                  |        |                  |      |                  |        |
|-----------------|-----------|----|-----------|---|------|------------------|--------|------------------|------|------------------|--------|
| <i>CCND1</i>    | rs642661  | 11 | 69115806  | T | 0.97 | 1.3 (1.02-1.64)  | 0.03   | 0.93 (0.71-1.23) | 0.63 | 1.13 (0.95-1.35) | 0.18   |
| <i>NKD1</i>     | rs6500315 | 16 | 49065602  | G | 0.79 | 1.1 (1-1.21)     | 0.06   | 0.98 (0.88-1.09) | 0.71 | 1.04 (0.97-1.12) | 0.26   |
| <i>PPP3CA</i>   | rs6532916 | 4  | 102227529 | G | 0.13 | 1.24 (1.1-1.4)   | 0.0007 | 0.99 (0.89-1.11) | 0.86 | 1.09 (1.01-1.19) | 0.03   |
| <i>PPP3R1</i>   | rs6546359 | 2  | 68329729  | C | 0.74 | 1.06 (0.96-1.16) | 0.26   | 1.04 (0.94-1.15) | 0.46 | 1.05 (0.98-1.12) | 0.18   |
| <i>JUN</i>      | rs6684750 | 1  | 59040156  | C | 0.74 | 1.13 (1.03-1.24) | 0.01   | 0.94 (0.86-1.04) | 0.24 | 1.04 (0.97-1.11) | 0.29   |
| <i>CACYBP</i>   | rs6686962 | 1  | 171685226 | A | 0.97 | 1.25 (1-1.56)    | 0.05   | 0.97 (0.79-1.19) | 0.76 | 1.09 (0.94-1.27) | 0.26   |
| <i>WNT6</i>     | rs6747776 | 2  | 219550823 | C | 0.85 | 1.03 (0.92-1.16) | 0.59   | 0.98 (0.86-1.1)  | 0.70 | 1.01 (0.93-1.09) | 0.89   |
| <i>TCF7L1</i>   | rs6748258 | 2  | 85417638  | T | 0.77 | 1.16 (1.06-1.28) | 0.002  | 0.98 (0.9-1.07)  | 0.59 | 1.06 (0.99-1.13) | 0.09   |
| <i>FZD7</i>     | rs6755553 | 2  | 202790866 | T | 0.55 | 1.08 (0.99-1.17) | 0.09   | 1 (0.92-1.08)    | 0.91 | 1.03 (0.98-1.09) | 0.27   |
| <i>SENP2</i>    | rs6762208 | 3  | 186813867 | A | 0.36 | 1.09 (1-1.19)    | 0.04   | 0.99 (0.91-1.08) | 0.84 | 1.04 (0.98-1.11) | 0.19   |
| <i>GSK3B</i>    | rs6805251 | 3  | 121043296 | T | 0.4  | 1.13 (1.04-1.23) | 0.004  | 0.97 (0.89-1.05) | 0.41 | 1.04 (0.99-1.11) | 0.15   |
| <i>CAMK2D</i>   | rs6850980 | 4  | 115067898 | G | 0.34 | 1.1 (1.01-1.2)   | 0.03   | 1.06 (0.98-1.16) | 0.15 | 1.08 (1.02-1.15) | 0.009  |
| <i>PRICKLE2</i> | rs696224  | 3  | 64142292  | T | 0.06 | 1.27 (1.06-1.53) | 0.008  | 1.08 (0.88-1.33) | 0.44 | 1.19 (1.04-1.36) | 0.01   |
| <i>CUL1</i>     | rs6971248 | 7  | 147814215 | T | 0.27 | 1.11 (1.01-1.21) | 0.03   | 1.01 (0.92-1.11) | 0.86 | 1.06 (0.99-1.13) | 0.10   |
| <i>PPP2R2A</i>  | rs6996634 | 8  | 26159815  | A | 0.45 | 1.09 (1.01-1.19) | 0.03   | 1.05 (0.97-1.14) | 0.21 | 1.07 (1.01-1.14) | 0.02   |
| <i>DAAMI</i>    | rs7145688 | 14 | 58861795  | T | 0.26 | 1.1 (1-1.21)     | 0.04   | 1.01 (0.92-1.11) | 0.85 | 1.05 (0.99-1.13) | 0.12   |
| <i>CHP</i>      | rs7163649 | 15 | 39374090  | A | 0.68 | 0.97 (0.88-1.05) | 0.42   | 1.04 (0.95-1.13) | 0.39 | 1 (0.94-1.06)    | 0.96   |
| <i>SMAD3</i>    | rs7178347 | 15 | 65108440  | T | 0.35 | 1.16 (1.06-1.26) | 0.0009 | 1.07 (0.98-1.16) | 0.13 | 1.11 (1.05-1.18) | 0.0006 |
| <i>AXIN1</i>    | rs7195617 | 16 | 316782    | A | 0.67 | 1.11 (1.02-1.21) | 0.01   | 0.96 (0.88-1.04) | 0.27 | 1.03 (0.97-1.09) | 0.35   |
| <i>AXIN2</i>    | rs7213080 | 17 | 60852046  | C | 0.97 | 1.33 (1.04-1.7)  | 0.02   | 0.9 (0.69-1.16)  | 0.40 | 1.1 (0.92-1.32)  | 0.29   |
| <i>PPP2R1A</i>  | rs7256300 | 19 | 57434028  | G | 0.88 | 1.16 (1.02-1.31) | 0.03   | 0.99 (0.89-1.1)  | 0.80 | 1.05 (0.97-1.14) | 0.20   |
| <i>CSNK2A1</i>  | rs7267034 | 20 | 441609    | T | 0.86 | 1.13 (1-1.26)    | 0.05   | 0.96 (0.84-1.09) | 0.52 | 1.05 (0.96-1.15) | 0.28   |
| <i>TCF3</i>     | rs7351116 | 19 | 1633776   | T | 0.19 | 1.03 (0.93-1.14) | 0.60   | 1.06 (0.92-1.22) | 0.42 | 1.04 (0.96-1.13) | 0.37   |
| <i>WNT9A</i>    | rs7552818 | 1  | 224407626 | G | 0.14 | 1.13 (1-1.27)    | 0.05   | 1.06 (0.95-1.18) | 0.29 | 1.09 (1.01-1.18) | 0.03   |
| <i>TBLIXR1</i>  | rs7612873 | 3  | 178082147 | A | 0.87 | 1.17 (1.04-1.31) | 0.008  | 1.01 (0.9-1.12)  | 0.93 | 1.08 (1-1.17)    | 0.06   |
| <i>MAPK10</i>   | rs7668374 | 4  | 87465689  | T | 0.22 | 1.13 (1.02-1.25) | 0.02   | 1.02 (0.92-1.14) | 0.69 | 1.08 (1-1.16)    | 0.05   |
| <i>WNT8A</i>    | rs7705323 | 5  | 137428572 | T | 0.83 | 1.03 (0.93-1.15) | 0.56   | 1.07 (0.97-1.19) | 0.19 | 1.05 (0.98-1.13) | 0.17   |
| <i>SFRP1</i>    | rs7834090 | 8  | 41261852  | T | 0.04 | 1.32 (1.07-1.64) | 0.01   | 1.01 (0.81-1.26) | 0.93 | 1.16 (1-1.35)    | 0.06   |
| <i>PLCB3</i>    | rs7943988 | 11 | 63780547  | G | 0.71 | 1.06 (0.97-1.16) | 0.18   | 1.01 (0.82-1.25) | 0.92 | 1.05 (0.97-1.15) | 0.20   |
| <i>WIF1</i>     | rs7960504 | 12 | 63732203  | T | 0.39 | 1.1 (1.01-1.2)   | 0.03   | 1.01 (0.92-1.1)  | 0.86 | 1.06 (0.99-1.12) | 0.08   |

|                 |           |    |           |   |      |                  |       |                  |      |                  |       |
|-----------------|-----------|----|-----------|---|------|------------------|-------|------------------|------|------------------|-------|
| <i>NFATC1</i>   | rs8090560 | 18 | 75314143  | A | 0.2  | 1.15 (1.04-1.28) | 0.009 | 1.03 (0.92-1.14) | 0.63 | 1.09 (1.01-1.17) | 0.03  |
| <i>FZD6</i>     | rs827536  | 8  | 104392202 | C | 0.54 | 0.95 (0.87-1.03) | 0.21  | 1.07 (0.98-1.15) | 0.13 | 1.01 (0.95-1.07) | 0.82  |
| <i>LRP5</i>     | rs901824  | 11 | 67962749  | C | 0.09 | 1.08 (0.94-1.25) | 0.27  | 1.03 (0.86-1.23) | 0.77 | 1.06 (0.95-1.19) | 0.30  |
| <i>CTBP2</i>    | rs9422860 | 10 | 126906113 | G | 0.92 | 1.27 (1.1-1.47)  | 0.001 | 0.98 (0.84-1.16) | 0.83 | 1.13 (1.02-1.26) | 0.03  |
| <i>PPARD</i>    | rs9470015 | 6  | 35477062  | A | 0.19 | 1.1 (0.99-1.22)  | 0.09  | 1.17 (1.03-1.32) | 0.02 | 1.12 (1.04-1.22) | 0.004 |
| <i>DAAM2</i>    | rs9471186 | 6  | 39919545  | G | 0.54 | 1.12 (1.03-1.21) | 0.009 | 1 (0.92-1.09)    | 0.93 | 1.06 (1-1.12)    | 0.05  |
| <i>CSNK1A1L</i> | rs9576222 | 13 | 36687910  | C | 0.24 | 1.12 (1.02-1.23) | 0.02  | 1.07 (0.98-1.17) | 0.11 | 1.09 (1.03-1.16) | 0.007 |
| <i>CSNK1E</i>   | rs9622773 | 22 | 37003246  | A | 0.18 | 1.08 (0.97-1.21) | 0.14  | 1.01 (0.9-1.14)  | 0.84 | 1.05 (0.97-1.14) | 0.22  |
| <i>WNT11</i>    | rs9787822 | 11 | 75567110  | A | 0.71 | 1.11 (1.01-1.21) | 0.02  | 0.98 (0.9-1.07)  | 0.68 | 1.04 (0.98-1.11) | 0.21  |
| <i>PRKCB1</i>   | rs9930905 | 16 | 23977481  | C | 0.27 | 1.11 (1.01-1.22) | 0.03  | 0.96 (0.87-1.06) | 0.42 | 1.03 (0.97-1.11) | 0.34  |

Allele freq is based on WTCCC case samples. Three Study P-values are from the imputed meta-analysis of WTCCC, DGI, FUSION cohorts, produced by DIAGRAM consortium. SNP and gene positions are based on NCBI Build 35. Alleles are based on the forward strand

**Supplementary Table 2: SNPs within the top 12 ranking pathways (excluding WNT signaling)**

| PathwayID | Gene           | SNP        | Chr | Position  | Risk / Non – Risk Allele | Risk Freq | 3Study OR        | 3Study P |
|-----------|----------------|------------|-----|-----------|--------------------------|-----------|------------------|----------|
| 1         | <i>PDC</i>     | rs480075   | 1   | 183187993 | A / G                    | 0.18      | 1.14 (1.05-1.23) | 0.002    |
| 1         | <i>PRKG1</i>   | rs11000542 | 10  | 53469271  | G / A                    | 0.73      | 1.1 (1.03-1.17)  | 0.003    |
| 1         | <i>CAMK2D</i>  | rs6850980  | 4   | 115067898 | G / A                    | 0.34      | 1.08 (1.02-1.15) | 0.009    |
| 1         | <i>CNGA3</i>   | rs3769754  | 2   | 98448218  | C / A                    | 0.42      | 1.07 (1.01-1.14) | 0.02     |
| 1         | <i>CAMK2G</i>  | rs2664280  | 10  | 75287350  | T / A                    | 0.56      | 1.07 (1.01-1.13) | 0.03     |
| 1         | <i>CALML3</i>  | rs4076513  | 10  | 5607417   | A / C                    | 0.97      | 1.2 (1.02-1.41)  | 0.03     |
| 1         | <i>PDE1C</i>   | rs10247918 | 7   | 31627635  | A / G                    | 0.34      | 1.07 (1-1.13)    | 0.04     |
| 1         | <i>CLCA1</i>   | rs1547036  | 1   | 86700643  | C / A                    | 0.26      | 1.07 (1-1.15)    | 0.05     |
| 1         | <i>CAMK2A</i>  | rs10066581 | 5   | 149595874 | G / A                    | 0.86      | 1.09 (1-1.18)    | 0.05     |
| 1         | <i>PRKACB</i>  | rs11163905 | 1   | 84306420  | G / A                    | 0.46      | 1.06 (1-1.12)    | 0.05     |
| 1         | <i>CLCA4</i>   | rs12734135 | 1   | 86704654  | T / C                    | 0.27      | 1.07 (1-1.15)    | 0.05     |
| 1         | <i>CALM2</i>   | rs11125126 | 2   | 47307030  | A / G                    | 0.77      | 1.07 (1-1.14)    | 0.06     |
| 1         | <i>CALM1</i>   | rs2300500  | 14  | 89935470  | G / C                    | 0.45      | 1.06 (1-1.12)    | 0.07     |
| 1         | <i>CAMK2B</i>  | rs3934888  | 7   | 44107093  | G / A                    | 0.40      | 1.05 (0.99-1.11) | 0.09     |
| 1         | <i>CALM3</i>   | rs710889   | 19  | 51804580  | T / C                    | 0.37      | 1.05 (0.98-1.11) | 0.15     |
| 1         | <i>CNGB1</i>   | rs3784900  | 16  | 56513317  | G / A                    | 0.19      | 1.05 (0.98-1.13) | 0.16     |
| 1         | <i>ADRBK2</i>  | rs738194   | 22  | 24229975  | G / C                    | 0.58      | 1.04 (0.98-1.11) | 0.17     |
| 1         | <i>ARRB2</i>   | rs2089480  | 17  | 4558548   | C / G                    | 0.78      | 1.03 (0.95-1.1)  | 0.48     |
| 1         | <i>ADCY3</i>   | rs17046666 | 2   | 24982002  | C / G                    | 0.09      | 1.04 (0.93-1.16) | 0.50     |
| 1         | <i>CLCA2</i>   | rs1931363  | 1   | 86610578  | G / A                    | 0.73      | 1.02 (0.96-1.08) | 0.57     |
| 1         | <i>GUCA1B</i>  | rs9369346  | 6   | 42267110  | G / C                    | 0.62      | 1.01 (0.95-1.07) | 0.78     |
| 1         | <i>GUCA1C</i>  | rs2715719  | 3   | 110143381 | C / G                    | 0.16      | 1 (0.92-1.09)    | 0.98     |
| 2         | <i>PGDS</i>    | rs10084984 | 4   | 95611753  | T / C                    | 0.84      | 1.18 (1.09-1.27) | 0.00002  |
| 2         | <i>HPGD</i>    | rs4624634  | 4   | 175716919 | T / C                    | 0.31      | 1.09 (1.02-1.16) | 0.007    |
| 2         | <i>CYP7B1</i>  | rs7841297  | 8   | 65711896  | C / G                    | 0.86      | 1.12 (1.03-1.22) | 0.008    |
| 2         | <i>ALOX5AP</i> | rs17074898 | 13  | 30183532  | G / A                    | 0.96      | 1.2 (1.05-1.37)  | 0.008    |
| 2         | <i>OXSM</i>    | rs4527340  | 3   | 25861745  | T / G                    | 0.84      | 1.1 (1.02-1.19)  | 0.01     |
| 2         | <i>LTA4H</i>   | rs2660851  | 12  | 94947165  | T / G                    | 0.50      | 1.08 (1.02-1.14) | 0.01     |
| 2         | <i>TGS2</i>    | rs2383529  | 1   | 183400749 | A / G                    | 0.79      | 1.09 (1.02-1.17) | 0.02     |
| 2         | <i>CYP39A1</i> | rs1534357  | 6   | 46641731  | C / G                    | 0.97      | 1.21 (1.03-1.41) | 0.02     |
| 2         | <i>SYK</i>     | rs158688   | 9   | 90738409  | A / G                    | 0.67      | 1.07 (1.01-1.14) | 0.02     |
| 2         | <i>ALOX5</i>   | rs7099684  | 10  | 45217161  | A / T                    | 0.22      | 1.09 (1.01-1.17) | 0.02     |
| 2         | <i>ALOX12</i>  | rs11571353 | 17  | 6855064   | C / T                    | 0.94      | 1.12 (1.01-1.24) | 0.03     |
| 2         | <i>AKR1D1</i>  | rs6467733  | 7   | 137207117 | G / C                    | 0.14      | 1.1 (1.01-1.19)  | 0.03     |
| 2         | <i>TBXAS1</i>  | rs12703395 | 7   | 138880556 | T / C                    | 0.82      | 1.08 (1-1.16)    | 0.04     |
| 2         | <i>BRCA1</i>   | rs8176198  | 17  | 38484063  | T / A                    | 0.36      | 1.07 (1-1.13)    | 0.04     |
| 2         | <i>PTGS1</i>   | rs1332408  | 9   | 122271713 | A / C                    | 0.24      | 1.07 (1-1.14)    | 0.07     |
| 2         | <i>FCERIA</i>  | rs2427837  | 1   | 156071618 | G / A                    | 0.72      | 1.06 (1-1.13)    | 0.07     |
| 2         | <i>ALOX12B</i> | rs2304906  | 17  | 7924406   | A / G                    | 0.03      | 1.12 (0.97-1.3)  | 0.12     |
| 2         | <i>AGPAT1</i>  | rs408359   | 6   | 32249861  | A / G                    | 0.07      | 1.08 (0.96-1.21) | 0.23     |
| 2         | <i>MGST2</i>   | rs8192100  | 4   | 140974588 | C / A                    | 0.14      | 1.05 (0.97-1.15) | 0.23     |
| 2         | <i>QKI</i>     | rs7742234  | 6   | 164119586 | C / T                    | 0.91      | 1.05 (0.96-1.14) | 0.27     |
| 2         | <i>UGDH</i>    | rs1450     | 4   | 39323080  | C / T                    | 0.49      | 1.03 (0.97-1.09) | 0.32     |
| 2         | <i>ALOX15B</i> | rs4468690  | 17  | 7881479   | T / C                    | 0.16      | 1.04 (0.96-1.12) | 0.39     |
| 2         | <i>PTGES3</i>  | rs17444799 | 12  | 55350666  | C / T                    | 0.94      | 1.04 (0.93-1.16) | 0.52     |

|   |                |            |    |           |       |      |                  |          |
|---|----------------|------------|----|-----------|-------|------|------------------|----------|
| 2 | <i>AGT</i>     | rs4847008  | 1  | 227171961 | T / G | 0.22 | 1.02 (0.95-1.1)  | 0.53     |
| 2 | <i>MIF</i>     | rs5751761  | 22 | 22568290  | T / C | 0.56 | 1.02 (0.96-1.08) | 0.54     |
| 2 | <i>GGTLA1</i>  | rs2275985  | 22 | 22954647  | C / A | 0.88 | 1.02 (0.94-1.11) | 0.60     |
| 2 | <i>ALOXE3</i>  | rs3027209  | 17 | 7955141   | G / A | 0.18 | 1.02 (0.94-1.1)  | 0.64     |
| 2 | <i>CYP7A1</i>  | rs17202769 | 8  | 59548908  | T / C | 0.84 | 1 (0.92-1.09)    | 0.98     |
| 3 | <i>TCF7L2</i>  | rs4506565  | 10 | 114746031 | T / A | 0.39 | 1.34 (1.26-1.42) | 4.48E-19 |
| 3 | <i>DKK2</i>    | rs10028834 | 4  | 108211197 | T / G | 0.08 | 1.16 (1.04-1.3)  | 0.007    |
| 3 | <i>TCF4</i>    | rs1261134  | 18 | 51082761  | T / A | 0.40 | 1.08 (1.01-1.14) | 0.02     |
| 3 | <i>CXXC4</i>   | rs488076   | 4  | 105873027 | A / C | 0.36 | 1.07 (1.01-1.14) | 0.03     |
| 3 | <i>PPAP2B</i>  | rs6666317  | 1  | 56616906  | A / C | 0.29 | 1.07 (1-1.15)    | 0.04     |
| 3 | <i>TLE1</i>    | rs11794108 | 9  | 81244452  | T / C | 0.13 | 1.1 (1-1.21)     | 0.05     |
| 3 | <i>LRP6</i>    | rs12425946 | 12 | 12302231  | G / A | 0.85 | 1.08 (0.99-1.17) | 0.08     |
| 3 | <i>TCF7L1</i>  | rs6748258  | 2  | 85417638  | T / A | 0.77 | 1.06 (0.99-1.13) | 0.09     |
| 3 | <i>SIX3</i>    | rs895636   | 2  | 45100004  | C / T | 0.81 | 1.05 (0.98-1.14) | 0.16     |
| 3 | <i>SEN2</i>    | rs6762208  | 3  | 186813867 | A / C | 0.36 | 1.04 (0.98-1.11) | 0.19     |
| 3 | <i>PPP2R1A</i> | rs7256300  | 19 | 57434028  | G / A | 0.88 | 1.05 (0.97-1.14) | 0.20     |
| 3 | <i>LRP1</i>    | rs4759277  | 12 | 55819957  | C / A | 0.65 | 1.04 (0.98-1.1)  | 0.21     |
| 3 | <i>PPP2R1B</i> | rs11601674 | 11 | 111139564 | T / C | 0.74 | 1.04 (0.97-1.1)  | 0.29     |
| 3 | <i>AXIN2</i>   | rs7213080  | 17 | 60852046  | C / T | 0.97 | 1.1 (0.92-1.32)  | 0.29     |
| 3 | <i>FRZB</i>    | rs288248   | 2  | 183537854 | A / G | 0.68 | 1.03 (0.97-1.09) | 0.34     |
| 3 | <i>AXIN1</i>   | rs7195617  | 16 | 316782    | A / G | 0.67 | 1.03 (0.97-1.09) | 0.35     |
| 3 | <i>NLK</i>     | rs4239211  | 17 | 23333545  | G / C | 0.28 | 1.03 (0.97-1.1)  | 0.36     |
| 3 | <i>BARX1</i>   | rs1316814  | 9  | 93822273  | A / G | 0.52 | 1.02 (0.97-1.08) | 0.44     |
| 3 | <i>LRP4</i>    | rs7112060  | 11 | 46848477  | T / C | 0.08 | 1.02 (0.92-1.13) | 0.73     |
| 3 | <i>DKK4</i>    | rs2073664  | 8  | 42350943  | G / A | 0.94 | 1.01 (0.91-1.12) | 0.84     |
| 4 | <i>FOXC1</i>   | rs9405496  | 6  | 1553630   | C / A | 0.12 | 1.17 (1.07-1.28) | 0.0009   |
| 4 | <i>SOSTDC1</i> | rs10214948 | 7  | 16334138  | T / C | 0.86 | 1.12 (1.03-1.21) | 0.005    |
| 4 | <i>LEF1</i>    | rs4956041  | 4  | 109471518 | T / C | 0.60 | 1.07 (1.01-1.14) | 0.02     |
| 4 | <i>TUFT1</i>   | rs12121608 | 1  | 148328261 | C / T | 0.86 | 1.09 (1.01-1.18) | 0.02     |
| 4 | <i>FGF4</i>    | rs3168175  | 11 | 69295251  | A / C | 0.87 | 1.09 (1-1.18)    | 0.04     |
| 4 | <i>ITGA6</i>   | rs7564591  | 2  | 173183034 | G / C | 0.22 | 1.07 (1-1.15)    | 0.04     |
| 4 | <i>ACVR2B</i>  | rs11926767 | 3  | 38502917  | C / T | 0.40 | 1.06 (1-1.13)    | 0.05     |
| 4 | <i>CTNNB1</i>  | rs4459874  | 3  | 41041225  | A / G | 0.79 | 1.06 (0.99-1.14) | 0.09     |
| 4 | <i>RUNX2</i>   | rs4510673  | 6  | 45458085  | G / A | 0.60 | 1.05 (0.99-1.11) | 0.11     |
| 4 | <i>ZNF22</i>   | rs10793586 | 10 | 44931083  | T / C | 0.49 | 1.05 (0.99-1.11) | 0.11     |
| 4 | <i>NFIC</i>    | rs918171   | 19 | 3287539   | C / T | 0.94 | 1.08 (0.97-1.19) | 0.16     |
| 4 | <i>FST</i>     | rs4865763  | 5  | 52632147  | G / A | 0.51 | 1.04 (0.98-1.1)  | 0.22     |
| 4 | <i>PDGFRA</i>  | rs1507968  | 4  | 55150421  | C / G | 0.93 | 1.06 (0.96-1.18) | 0.25     |
| 4 | <i>JAG2</i>    | rs2816661  | 14 | 104667055 | C / A | 0.13 | 1.05 (0.96-1.15) | 0.30     |
| 4 | <i>CHUK</i>    | rs11597086 | 10 | 101943695 | A / C | 0.59 | 1.03 (0.97-1.09) | 0.32     |
| 4 | <i>DLL1</i>    | rs9460089  | 6  | 170466353 | T / G | 0.84 | 1.04 (0.96-1.12) | 0.35     |
| 4 | <i>BMP7</i>    | rs13040929 | 20 | 55159138  | T / C | 0.08 | 1.05 (0.94-1.16) | 0.39     |
| 4 | <i>LAMB1</i>   | rs17154667 | 7  | 107197382 | C / A | 0.29 | 1.03 (0.96-1.09) | 0.43     |
| 4 | <i>BMP4</i>    | rs8009420  | 14 | 53333601  | A / C | 0.10 | 1.03 (0.92-1.14) | 0.65     |
| 5 | <i>CHST3</i>   | rs731027   | 10 | 73442342  | C / T | 0.51 | 1.12 (1.05-1.18) | 0.0002   |
| 5 | <i>EXT1</i>    | rs9656922  | 8  | 118925250 | C / T | 0.06 | 1.2 (1.05-1.38)  | 0.007    |
| 5 | <i>HAS1</i>    | rs1868940  | 19 | 56879614  | C / A | 0.83 | 1.12 (1.03-1.21) | 0.007    |
| 5 | <i>EXT2</i>    | rs7108467  | 11 | 44114729  | C / G | 0.79 | 1.08 (1.01-1.15) | 0.03     |

|   |                |            |    |           |       |      |                  |       |
|---|----------------|------------|----|-----------|-------|------|------------------|-------|
| 5 | <i>CHGN</i>    | rs6981526  | 8  | 19635482  | C / G | 0.33 | 1.07 (1.01-1.14) | 0.03  |
| 5 | <i>XYLT1</i>   | rs4782006  | 16 | 17319208  | G / C | 0.65 | 1.06 (1.01-1.13) | 0.03  |
| 5 | <i>XYLT2</i>   | rs2586465  | 17 | 45780966  | T / G | 0.49 | 1.06 (1-1.13)    | 0.04  |
| 5 | <i>CHST9</i>   | rs10502482 | 18 | 22839434  | T / C | 0.22 | 1.08 (1-1.16)    | 0.04  |
| 5 | <i>SLC35D1</i> | rs12082503 | 1  | 67201530  | C / T | 0.92 | 1.11 (1-1.24)    | 0.05  |
| 5 | <i>ITIH5</i>   | rs927723   | 10 | 7569625   | G / A | 0.73 | 1.06 (1-1.14)    | 0.07  |
| 5 | <i>ITIH4</i>   | rs2276817  | 3  | 52835976  | T / C | 0.23 | 1.06 (0.99-1.14) | 0.09  |
| 5 | <i>SGSH</i>    | rs7207000  | 17 | 75806953  | T / C | 0.62 | 1.05 (0.99-1.11) | 0.12  |
| 5 | <i>CHST11</i>  | rs11112069 | 12 | 103369485 | A / T | 0.20 | 1.06 (0.98-1.14) | 0.14  |
| 5 | <i>ARSB</i>    | rs3857405  | 5  | 78153340  | A / G | 0.37 | 1.04 (0.98-1.11) | 0.18  |
| 5 | <i>MGAT1</i>   | rs6884018  | 5  | 180141456 | C / T | 0.26 | 1.04 (0.97-1.11) | 0.24  |
| 5 | <i>CHST12</i>  | rs10227362 | 7  | 2230040   | A / G | 0.21 | 1.04 (0.97-1.12) | 0.26  |
| 5 | <i>UGDH</i>    | rs1450     | 4  | 39323080  | C / T | 0.49 | 1.03 (0.97-1.09) | 0.32  |
| 5 | <i>SUMF1</i>   | rs1625605  | 3  | 4431185   | T / G | 0.69 | 1.03 (0.97-1.09) | 0.32  |
| 5 | <i>ITIH3</i>   | rs2240920  | 3  | 52806049  | C / T | 0.66 | 1.02 (0.97-1.09) | 0.41  |
| 5 | <i>GUSB</i>    | rs12698511 | 7  | 64919069  | C / A | 0.94 | 1.05 (0.93-1.17) | 0.43  |
| 5 | <i>CHST6</i>   | rs247445   | 16 | 74078531  | G / A | 0.37 | 1.02 (0.96-1.08) | 0.53  |
| 5 | <i>HS2ST1</i>  | rs6686833  | 1  | 87395858  | A / G | 0.25 | 1.02 (0.95-1.1)  | 0.54  |
| 5 | <i>GLCE</i>    | rs4116076  | 15 | 67278521  | G / T | 0.79 | 1.02 (0.95-1.09) | 0.55  |
| 5 | <i>GALNT5</i>  | rs2166487  | 2  | 157970751 | C / G | 0.93 | 1.03 (0.93-1.14) | 0.56  |
| 5 | <i>GCNT2</i>   | rs16870442 | 6  | 10603222  | A / G | 0.98 | 1.06 (0.87-1.29) | 0.56  |
| 5 | <i>GALNS</i>   | rs3826067  | 16 | 87412581  | C / T | 0.71 | 1.02 (0.96-1.08) | 0.59  |
| 5 | <i>HEXB</i>    | rs16872173 | 5  | 74004814  | C / A | 0.14 | 1.02 (0.94-1.11) | 0.60  |
| 5 | <i>CLN6</i>    | rs10431808 | 15 | 66294326  | A / G | 0.57 | 1.01 (0.96-1.07) | 0.63  |
| 5 | <i>ITIH2</i>   | rs11255291 | 10 | 7776910   | C / T | 0.56 | 1.01 (0.96-1.07) | 0.64  |
| 5 | <i>ITIH1</i>   | rs2071508  | 3  | 52801886  | A / G | 0.35 | 1.01 (0.95-1.07) | 0.81  |
| 5 | <i>HEXA</i>    | rs4777506  | 15 | 70456934  | A / G | 0.05 | 1.01 (0.87-1.17) | 0.89  |
| 5 | <i>GNS</i>     | rs1445442  | 12 | 63577561  | A / G | 0.33 | 1 (0.95-1.07)    | 0.92  |
| 6 | <i>PACSN1</i>  | rs9296115  | 6  | 34542693  | A / C | 0.80 | 1.11 (1.04-1.19) | 0.002 |
| 6 | <i>GULP1</i>   | rs11688935 | 2  | 189001411 | G / A | 0.34 | 1.1 (1.03-1.17)  | 0.003 |
| 6 | <i>SPACA3</i>  | rs28909    | 17 | 28327481  | C / T | 0.15 | 1.13 (1.04-1.23) | 0.006 |
| 6 | <i>CORO1C</i>  | rs10746129 | 12 | 107593555 | C / T | 0.45 | 1.08 (1.02-1.14) | 0.007 |
| 6 | <i>MIB1</i>    | rs2959510  | 18 | 17579480  | A / G | 0.12 | 1.13 (1.03-1.25) | 0.01  |
| 6 | <i>ACTN4</i>   | rs12984247 | 19 | 43844748  | C / T | 0.76 | 1.09 (1.02-1.16) | 0.01  |
| 6 | <i>GATA2</i>   | rs7641386  | 3  | 129727360 | A / G | 0.90 | 1.14 (1.03-1.26) | 0.01  |
| 6 | <i>FGF10</i>   | rs6451758  | 5  | 44341272  | T / A | 0.82 | 1.08 (1.01-1.16) | 0.03  |
| 6 | <i>ABCA1</i>   | rs1809924  | 9  | 104894024 | G / C | 0.31 | 1.07 (1.01-1.14) | 0.03  |
| 6 | <i>ADORA1</i>  | rs10800901 | 1  | 199842961 | A / G | 0.32 | 1.07 (1.01-1.14) | 0.03  |
| 6 | <i>M6PR</i>    | rs12423746 | 12 | 9004269   | T / G | 0.47 | 1.06 (1-1.12)    | 0.04  |
| 6 | <i>ELMO2</i>   | rs2297056  | 20 | 44429857  | G / A | 0.08 | 1.13 (1.01-1.27) | 0.04  |
| 6 | <i>MYO7A</i>   | rs2276293  | 11 | 76594868  | G / A | 0.49 | 1.06 (1-1.12)    | 0.04  |
| 6 | <i>ELMO1</i>   | rs1882079  | 7  | 37164506  | C / T | 0.49 | 1.06 (1-1.12)    | 0.04  |
| 6 | <i>DOCK1</i>   | rs11017787 | 10 | 129076888 | T / A | 0.31 | 1.07 (1-1.14)    | 0.05  |
| 6 | <i>RAMP3</i>   | rs2877307  | 7  | 44951531  | A / G | 0.23 | 1.08 (1-1.15)    | 0.05  |
| 6 | <i>ITSN1</i>   | rs9979150  | 21 | 34163750  | A / G | 0.43 | 1.06 (1-1.12)    | 0.05  |
| 6 | <i>MSR1</i>    | rs12675898 | 8  | 16223671  | T / C | 0.95 | 1.14 (1-1.3)     | 0.05  |
| 6 | <i>GRIA1</i>   | rs545098   | 5  | 152884481 | C / T | 0.72 | 1.06 (1-1.13)    | 0.06  |
| 6 | <i>IGF2R</i>   | rs9295118  | 6  | 160378126 | A / T | 0.87 | 1.08 (1-1.18)    | 0.07  |



|   |                |            |    |           |       |      |                  |       |
|---|----------------|------------|----|-----------|-------|------|------------------|-------|
| 6 | <i>PPT1</i>    | rs3131650  | 1  | 40224816  | T / G | 0.29 | 1.06 (0.99-1.13) | 0.10  |
| 6 | <i>RBED1</i>   | rs17026285 | 2  | 85528416  | T / C | 0.77 | 1.06 (0.99-1.13) | 0.10  |
| 6 | <i>AHSG</i>    | rs4498037  | 3  | 187823965 | C / T | 0.75 | 1.05 (0.99-1.12) | 0.11  |
| 6 | <i>CEBPE</i>   | rs4982731  | 14 | 22655173  | T / C | 0.74 | 1.05 (0.99-1.12) | 0.12  |
| 6 | <i>CUBN</i>    | rs17336427 | 10 | 16968595  | C / G | 0.97 | 1.13 (0.96-1.33) | 0.14  |
| 6 | <i>FCN2</i>    | rs6537958  | 9  | 135006768 | C / T | 0.79 | 1.05 (0.98-1.13) | 0.15  |
| 6 | <i>ADRB2</i>   | rs11959615 | 5  | 148181509 | A / T | 0.56 | 1.04 (0.98-1.11) | 0.16  |
| 6 | <i>ELMOD1</i>  | rs7123473  | 11 | 106986661 | A / G | 0.03 | 1.14 (0.94-1.37) | 0.18  |
| 6 | <i>ADORA2A</i> | rs1041749  | 22 | 23170945  | T / C | 0.41 | 1.04 (0.98-1.1)  | 0.18  |
| 6 | <i>PICALM</i>  | rs3894654  | 11 | 85529106  | T / A | 0.06 | 1.09 (0.96-1.24) | 0.18  |
| 6 | <i>DNM1</i>    | rs7875406  | 9  | 128050572 | A / G | 0.96 | 1.09 (0.96-1.23) | 0.20  |
| 6 | <i>VAV1</i>    | rs2546133  | 19 | 6750677   | T / C | 0.11 | 1.07 (0.96-1.2)  | 0.22  |
| 6 | <i>LRP2</i>    | rs11887007 | 2  | 169975361 | A / C | 0.61 | 1.04 (0.98-1.1)  | 0.23  |
| 6 | <i>SFTPD</i>   | rs4255480  | 10 | 81725868  | C / T | 0.04 | 1.11 (0.93-1.33) | 0.25  |
| 6 | <i>ELMOD2</i>  | rs2874478  | 4  | 141761994 | A / G | 0.21 | 1.04 (0.97-1.12) | 0.25  |
| 6 | <i>SYNJ1</i>   | rs845007   | 21 | 32953744  | A / G | 0.06 | 1.08 (0.94-1.25) | 0.27  |
| 6 | <i>LRP1B</i>   | rs10190295 | 2  | 142309956 | T / C | 0.36 | 1.03 (0.97-1.1)  | 0.28  |
| 6 | <i>COLEC12</i> | rs2341746  | 18 | 495472    | T / G | 0.80 | 1.04 (0.97-1.11) | 0.29  |
| 6 | <i>RAC1</i>    | rs10234438 | 7  | 6196040   | A / G | 0.97 | 1.09 (0.92-1.28) | 0.31  |
| 6 | <i>CAP1</i>    | rs16826852 | 1  | 40200187  | G / A | 0.09 | 1.05 (0.95-1.16) | 0.31  |
| 6 | <i>EEA1</i>    | rs6538379  | 12 | 91979163  | G / A | 0.44 | 1.02 (0.97-1.08) | 0.45  |
| 6 | <i>LDLRAP1</i> | rs4075441  | 1  | 25591233  | A / G | 0.76 | 1.03 (0.96-1.1)  | 0.48  |
| 6 | <i>PACSIN3</i> | rs7937410  | 11 | 47162658  | G / C | 0.23 | 1.02 (0.96-1.09) | 0.58  |
| 6 | <i>FCN1</i>    | rs11103623 | 9  | 135112990 | T / C | 0.60 | 1.02 (0.96-1.08) | 0.58  |
| 6 | <i>CD14</i>    | rs2569192  | 5  | 139995392 | C / G | 0.29 | 1.02 (0.96-1.08) | 0.59  |
| 6 | <i>PLD2</i>    | rs2286672  | 17 | 4659581   | T / C | 0.07 | 1.03 (0.93-1.13) | 0.60  |
| 6 | <i>LRP3</i>    | rs8101468  | 19 | 38372622  | C / A | 0.76 | 1.02 (0.95-1.09) | 0.63  |
| 6 | <i>HFE</i>     | rs707889   | 6  | 26203910  | A / G | 0.23 | 1.01 (0.95-1.09) | 0.72  |
| 6 | <i>CLTCL1</i>  | rs2800973  | 22 | 17543170  | C / T | 0.65 | 1.01 (0.94-1.07) | 0.86  |
| 6 | <i>MFGE8</i>   | rs1850324  | 15 | 87273271  | C / T | 0.40 | 1 (0.95-1.06)    | 0.89  |
| 6 | <i>CBL</i>     | rs7113047  | 11 | 118613322 | A / G | 0.73 | 1 (0.94-1.07)    | 0.89  |
| 6 | <i>CLN3</i>    | rs151181   | 16 | 28398018  | C / T | 0.41 | 1 (0.95-1.07)    | 0.90  |
| 6 | <i>PACSIN2</i> | rs5996250  | 22 | 41678832  | C / T | 0.08 | 1.01 (0.91-1.11) | 0.91  |
| 6 | <i>AP1S1</i>   | rs4727480  | 7  | 100393008 | A / G | 0.46 | 1 (0.95-1.06)    | 0.91  |
| 6 | <i>ASGR1</i>   | rs4464125  | 17 | 6991999   | G / A | 0.77 | 1 (0.94-1.07)    | 0.92  |
| 6 | <i>ARF6</i>    | rs11849760 | 14 | 49462470  | A / G | 0.90 | 1 (0.92-1.1)     | 0.93  |
| 6 | <i>CLEC7A</i>  | rs11053608 | 12 | 10166951  | G / T | 0.55 | 1 (0.94-1.06)    | 0.94  |
| 6 | <i>NEDD4L</i>  | rs17064520 | 18 | 54060610  | T / C | 0.15 | 1 (0.93-1.09)    | 0.95  |
| 7 | <i>NLGN1</i>   | rs573553   | 3  | 174686967 | G / T | 0.90 | 1.17 (1.06-1.28) | 0.002 |
| 7 | <i>CDH23</i>   | rs7910896  | 10 | 72979896  | T / C | 0.46 | 1.1 (1.04-1.17)  | 0.002 |
| 7 | <i>ATP2C1</i>  | rs643417   | 3  | 132096892 | C / T | 0.05 | 1.2 (1.05-1.36)  | 0.009 |
| 7 | <i>CDH20</i>   | rs8088963  | 18 | 57198294  | A / G | 0.67 | 1.06 (1-1.12)    | 0.07  |
| 7 | <i>CDH19</i>   | rs508987   | 18 | 62337483  | C / T | 0.78 | 1.06 (1-1.13)    | 0.07  |
| 7 | <i>CDH17</i>   | rs13256327 | 8  | 95244285  | G / A | 0.71 | 1.05 (0.99-1.13) | 0.13  |
| 7 | <i>PCDHB5</i>  | rs7730410  | 5  | 140499455 | T / C | 0.41 | 1.04 (0.98-1.11) | 0.17  |
| 7 | <i>PCDHB7</i>  | rs17286891 | 5  | 140532958 | A / G | 0.12 | 1.07 (0.96-1.18) | 0.21  |
| 7 | <i>FXYD5</i>   | rs11084803 | 19 | 40350568  | C / T | 0.80 | 1.04 (0.97-1.12) | 0.26  |
| 7 | <i>DSG1</i>    | rs11876192 | 18 | 27194032  | C / A | 0.77 | 1.03 (0.97-1.1)  | 0.36  |

|   |                 |            |    |           |       |      |                  |       |
|---|-----------------|------------|----|-----------|-------|------|------------------|-------|
| 7 | <i>ME2</i>      | rs1789223  | 18 | 46716208  | A / G | 0.63 | 1.03 (0.97-1.09) | 0.40  |
| 7 | <i>PCDHGB4</i>  | rs3805698  | 5  | 140801305 | G / T | 0.92 | 1.04 (0.93-1.16) | 0.47  |
| 7 | <i>PCDHB10</i>  | rs629168   | 5  | 140555395 | T / G | 0.59 | 1.02 (0.96-1.08) | 0.51  |
| 7 | <i>PCDHB9</i>   | rs2910324  | 5  | 140550383 | G / A | 0.59 | 1.02 (0.96-1.08) | 0.52  |
| 7 | <i>PCDHB4</i>   | rs3776100  | 5  | 140482361 | A / G | 0.23 | 1.02 (0.95-1.09) | 0.54  |
| 7 | <i>PCDH12</i>   | rs3761762  | 5  | 141319011 | G / A | 0.89 | 1.03 (0.94-1.13) | 0.55  |
| 7 | <i>PCDHB6</i>   | rs17629011 | 5  | 140508197 | T / C | 0.08 | 1.03 (0.92-1.14) | 0.64  |
| 7 | <i>CDH2</i>     | rs8084703  | 18 | 23750943  | A / G | 0.92 | 1.01 (0.91-1.11) | 0.88  |
| 7 | <i>PCDHB2</i>   | rs31861    | 5  | 140445772 | G / A | 0.08 | 1.01 (0.9-1.12)  | 0.91  |
| 8 | <i>HSD17B12</i> | rs6485456  | 11 | 43723478  | T / C | 0.33 | 1.1 (1.04-1.17)  | 0.002 |
| 8 | <i>PGM1</i>     | rs855351   | 1  | 63838471  | A / G | 0.15 | 1.11 (1.02-1.2)  | 0.01  |
| 8 | <i>GANC</i>     | rs10518763 | 15 | 40427287  | G / A | 0.08 | 1.13 (1.02-1.26) | 0.02  |
| 8 | <i>GLB1</i>     | rs4234236  | 3  | 32994420  | C / T | 0.17 | 1.1 (1.01-1.2)   | 0.02  |
| 8 | <i>PGM3</i>     | rs477061   | 6  | 83953352  | T / A | 0.77 | 1.08 (1.01-1.15) | 0.03  |
| 8 | <i>AKR1B1</i>   | rs6967329  | 7  | 133543678 | T / C | 0.27 | 1.08 (1.01-1.15) | 0.03  |
| 8 | <i>PFKP</i>     | rs12762013 | 10 | 3097539   | T / A | 0.95 | 1.09 (0.97-1.23) | 0.14  |
| 8 | <i>GCK</i>      | rs2300586  | 7  | 43992096  | A / G | 0.16 | 1.06 (0.98-1.15) | 0.18  |
| 8 | <i>RDH13</i>    | rs8113032  | 19 | 60245950  | A / G | 0.43 | 1.04 (0.98-1.11) | 0.18  |
| 8 | <i>HK3</i>      | rs4976662  | 5  | 176247905 | C / T | 0.68 | 1.04 (0.98-1.1)  | 0.21  |
| 8 | <i>GALK2</i>    | rs8025550  | 15 | 47302359  | G / C | 0.24 | 1.04 (0.97-1.11) | 0.25  |
| 8 | <i>LCT</i>      | rs2322660  | 2  | 136391051 | C / T | 0.22 | 1.04 (0.97-1.11) | 0.25  |
| 8 | <i>AKR1B10</i>  | rs3735041  | 7  | 133674984 | G / A | 0.26 | 1.04 (0.97-1.12) | 0.27  |
| 8 | <i>RDH14</i>    | rs4832602  | 2  | 18635083  | G / A | 0.31 | 1.03 (0.97-1.1)  | 0.31  |
| 8 | <i>LALBA</i>    | rs2114322  | 12 | 47237874  | C / T | 0.57 | 1.03 (0.97-1.09) | 0.32  |
| 8 | <i>PFKL</i>     | rs8134520  | 21 | 44548483  | A / G | 0.19 | 1.04 (0.96-1.11) | 0.35  |
| 8 | <i>GAA</i>      | rs12600845 | 17 | 75692309  | C / T | 0.53 | 1.02 (0.97-1.08) | 0.46  |
| 8 | <i>RDH11</i>    | rs1117516  | 14 | 67242647  | C / T | 0.38 | 1.02 (0.96-1.08) | 0.60  |
| 8 | <i>RDH12</i>    | rs910315   | 14 | 67258676  | A / G | 0.96 | 1.03 (0.88-1.21) | 0.70  |
| 8 | <i>UGP2</i>     | rs6546038  | 2  | 64028240  | G / A | 0.21 | 1.01 (0.94-1.09) | 0.76  |
| 8 | <i>PFKM</i>     | rs10875746 | 12 | 46804531  | A / C | 0.76 | 1.01 (0.94-1.08) | 0.80  |
| 8 | <i>G6PC</i>     | rs161634   | 17 | 38312011  | G / A | 0.13 | 1.01 (0.92-1.1)  | 0.89  |
| 9 | <i>TGFBR3</i>   | rs7524679  | 1  | 91891469  | A / G | 0.10 | 1.17 (1.07-1.29) | 0.001 |
| 9 | <i>TGFB3</i>    | rs3917201  | 14 | 75499308  | T / C | 0.77 | 1.12 (1.05-1.2)  | 0.001 |
| 9 | <i>GATA4</i>    | rs11250163 | 8  | 11633846  | A / C | 0.54 | 1.09 (1.03-1.16) | 0.003 |
| 9 | <i>BMP5</i>     | rs10485070 | 6  | 55679281  | G / A | 0.06 | 1.2 (1.06-1.35)  | 0.004 |
| 9 | <i>SMAD6</i>    | rs9888681  | 15 | 64720962  | T / C | 0.76 | 1.09 (1.02-1.16) | 0.01  |
| 9 | <i>MEF2C</i>    | rs2161228  | 5  | 88037554  | T / C | 0.11 | 1.13 (1.02-1.24) | 0.01  |
| 9 | <i>NKX2-5</i>   | rs7356620  | 5  | 172577126 | G / A | 0.33 | 1.08 (1.01-1.16) | 0.02  |
| 9 | <i>BMP10</i>    | rs4605401  | 2  | 69022667  | C / T | 0.69 | 1.06 (1-1.13)    | 0.05  |
| 9 | <i>TGFBR2</i>   | rs6790706  | 3  | 30666477  | A / G | 0.88 | 1.09 (1-1.19)    | 0.06  |
| 9 | <i>MAP3K7</i>   | rs1145721  | 6  | 91225674  | G / A | 0.36 | 1.06 (1-1.12)    | 0.07  |
| 9 | <i>CTNNB1</i>   | rs4459874  | 3  | 41041225  | A / G | 0.79 | 1.06 (0.99-1.14) | 0.09  |
| 9 | <i>ACVR1</i>    | rs10168000 | 2  | 158518590 | C / T | 0.83 | 1.07 (0.99-1.16) | 0.09  |
| 9 | <i>SMAD4</i>    | rs10502913 | 18 | 46822269  | G / A | 0.77 | 1.06 (0.99-1.13) | 0.10  |
| 9 | <i>BMPR2</i>    | rs16839090 | 2  | 203038567 | C / T | 0.13 | 1.07 (0.98-1.17) | 0.13  |
| 9 | <i>GSK3B</i>    | rs6805251  | 3  | 121043296 | T / C | 0.40 | 1.04 (0.99-1.11) | 0.15  |
| 9 | <i>MYL2</i>     | rs933296   | 12 | 109815568 | C / A | 0.69 | 1.04 (0.98-1.11) | 0.19  |
| 9 | <i>FZD1</i>     | rs17163799 | 7  | 90590566  | G / A | 0.72 | 1.04 (0.98-1.11) | 0.22  |

|    |                |            |    |           |       |      |                  |        |
|----|----------------|------------|----|-----------|-------|------|------------------|--------|
| 9  | <i>TGFBR1</i>  | rs10819641 | 9  | 99015786  | C / T | 0.94 | 1.06 (0.95-1.2)  | 0.30   |
| 9  | <i>BMPRIA</i>  | rs10887652 | 10 | 88501217  | G / C | 0.38 | 1.03 (0.97-1.09) | 0.31   |
| 9  | <i>AXIN1</i>   | rs7195617  | 16 | 316782    | A / G | 0.67 | 1.03 (0.97-1.09) | 0.35   |
| 9  | <i>NPPA</i>    | rs5065     | 1  | 11840334  | A / G | 0.86 | 1.04 (0.95-1.14) | 0.38   |
| 9  | <i>BMP7</i>    | rs13040929 | 20 | 55159138  | T / C | 0.08 | 1.05 (0.94-1.16) | 0.39   |
| 9  | <i>SMAD5</i>   | rs7701291  | 5  | 135519864 | G / C | 0.68 | 1.03 (0.97-1.09) | 0.41   |
| 9  | <i>APC</i>     | rs4365835  | 5  | 111977339 | C / T | 0.34 | 1.03 (0.96-1.09) | 0.46   |
| 9  | <i>NPPB</i>    | rs4846064  | 1  | 11869108  | T / C | 0.41 | 1.02 (0.96-1.08) | 0.49   |
| 9  | <i>ATF2</i>    | rs17270532 | 2  | 175842703 | A / C | 0.92 | 1.03 (0.92-1.14) | 0.62   |
| 9  | <i>NOG</i>     | rs12150511 | 17 | 52006359  | G / A | 0.92 | 1.03 (0.92-1.15) | 0.63   |
| 9  | <i>BMP4</i>    | rs8009420  | 14 | 53333601  | A / C | 0.10 | 1.03 (0.92-1.14) | 0.65   |
| 9  | <i>CHRD</i>    | rs7630982  | 3  | 185627348 | A / G | 0.08 | 1.02 (0.92-1.14) | 0.68   |
| 9  | <i>SMAD1</i>   | rs11100883 | 4  | 146808575 | G / A | 0.53 | 1 (0.95-1.06)    | 0.98   |
| 10 | <i>KL</i>      | rs7321110  | 13 | 32428155  | C / T | 0.05 | 1.29 (1.13-1.47) | 0.0002 |
| 10 | <i>MEPE</i>    | rs1463095  | 4  | 89149800  | A / G | 0.43 | 1.09 (1.03-1.15) | 0.005  |
| 10 | <i>SPP1</i>    | rs4693920  | 4  | 89221954  | C / T | 0.09 | 1.17 (1.04-1.32) | 0.009  |
| 10 | <i>ANKH</i>    | rs26306    | 5  | 14868699  | T / G | 0.58 | 1.07 (1.01-1.14) | 0.02   |
| 10 | <i>TUFT1</i>   | rs12121608 | 1  | 148328261 | C / T | 0.86 | 1.09 (1.01-1.18) | 0.02   |
| 10 | <i>EIF2AK3</i> | rs4449134  | 2  | 88686223  | A / G | 0.70 | 1.07 (1.01-1.14) | 0.03   |
| 10 | <i>CTNNB1</i>  | rs4459874  | 3  | 41041225  | A / G | 0.79 | 1.06 (0.99-1.14) | 0.09   |
| 10 | <i>CD276</i>   | rs7177814  | 15 | 71786642  | G / C | 0.10 | 1.08 (0.98-1.19) | 0.11   |
| 10 | <i>AHSG</i>    | rs4498037  | 3  | 187823965 | C / T | 0.75 | 1.05 (0.99-1.12) | 0.11   |
| 10 | <i>P2RX7</i>   | rs503720   | 12 | 120067794 | G / A | 0.70 | 1.05 (0.99-1.11) | 0.14   |
| 10 | <i>ACHE</i>    | rs3903230  | 7  | 100172362 | A / T | 0.90 | 1.08 (0.97-1.19) | 0.15   |
| 10 | <i>ADRB2</i>   | rs11959615 | 5  | 148181509 | A / T | 0.56 | 1.04 (0.98-1.11) | 0.16   |
| 10 | <i>PTN</i>     | rs322347   | 7  | 136450439 | A / G | 0.41 | 1.04 (0.98-1.1)  | 0.18   |
| 10 | <i>OSTN</i>    | rs7638730  | 3  | 192378732 | C / G | 0.35 | 1.04 (0.97-1.1)  | 0.27   |
| 10 | <i>AXIN2</i>   | rs7213080  | 17 | 60852046  | C / T | 0.97 | 1.1 (0.92-1.32)  | 0.29   |
| 10 | <i>SOST</i>    | rs4793022  | 17 | 39154381  | G / C | 0.61 | 1.03 (0.97-1.09) | 0.30   |
| 10 | <i>PTHLH</i>   | rs7978444  | 12 | 27951898  | T / C | 0.48 | 1.03 (0.97-1.09) | 0.30   |
| 10 | <i>AMBN</i>    | rs1907078  | 4  | 71619801  | G / C | 0.05 | 1.09 (0.92-1.29) | 0.31   |
| 10 | <i>PEX7</i>    | rs6926680  | 6  | 137271220 | G / A | 0.03 | 1.09 (0.92-1.28) | 0.34   |
| 10 | <i>FGF23</i>   | rs11063112 | 12 | 4348341   | T / A | 0.72 | 1.02 (0.96-1.09) | 0.56   |
| 10 | <i>BMP4</i>    | rs8009420  | 14 | 53333601  | A / C | 0.10 | 1.03 (0.92-1.14) | 0.65   |
| 10 | <i>CHRD</i>    | rs7630982  | 3  | 185627348 | A / G | 0.08 | 1.02 (0.92-1.14) | 0.68   |
| 10 | <i>STATH</i>   | rs776833   | 4  | 71055427  | T / C | 0.59 | 1.01 (0.95-1.07) | 0.75   |
| 10 | <i>MINPP1</i>  | rs2147287  | 10 | 89308314  | G / A | 0.62 | 1 (0.95-1.06)    | 0.91   |
| 10 | <i>KLF10</i>   | rs2511694  | 8  | 103784402 | G / A | 0.32 | 1 (0.94-1.07)    | 0.95   |
| 10 | <i>TOBI</i>    | rs4626     | 17 | 46295421  | T / C | 0.30 | 1 (0.94-1.07)    | 0.99   |
| 11 | <i>HIP1</i>    | rs237238   | 7  | 74856065  | A / G | 0.94 | 1.22 (1.09-1.37) | 0.0006 |
| 11 | <i>DNM3</i>    | rs10798751 | 1  | 168621004 | G / T | 0.35 | 1.1 (1.04-1.17)  | 0.002  |
| 11 | <i>PACSIN1</i> | rs9296115  | 6  | 34542693  | A / C | 0.80 | 1.11 (1.04-1.19) | 0.002  |
| 11 | <i>GULP1</i>   | rs11688935 | 2  | 189001411 | G / A | 0.34 | 1.1 (1.03-1.17)  | 0.003  |
| 11 | <i>SPACA3</i>  | rs28909    | 17 | 28327481  | C / T | 0.15 | 1.13 (1.04-1.23) | 0.006  |
| 11 | <i>CORO1C</i>  | rs10746129 | 12 | 107593555 | C / T | 0.45 | 1.08 (1.02-1.14) | 0.007  |
| 11 | <i>GHR</i>     | rs4866954  | 5  | 42782919  | T / C | 0.72 | 1.08 (1.02-1.15) | 0.01   |
| 11 | <i>SNX1</i>    | rs3816385  | 15 | 62205708  | G / A | 0.22 | 1.1 (1.02-1.18)  | 0.01   |
| 11 | <i>MIB1</i>    | rs2959510  | 18 | 17579480  | A / G | 0.12 | 1.13 (1.03-1.25) | 0.01   |

|    |                |            |    |           |       |      |                  |      |
|----|----------------|------------|----|-----------|-------|------|------------------|------|
| 11 | <i>AP3B1</i>   | rs7729157  | 5  | 77296459  | A / G | 0.05 | 1.23 (1.05-1.46) | 0.01 |
| 11 | <i>ACTN4</i>   | rs12984247 | 19 | 43844748  | C / T | 0.76 | 1.09 (1.02-1.16) | 0.01 |
| 11 | <i>GATA2</i>   | rs7641386  | 3  | 129727360 | A / G | 0.90 | 1.14 (1.03-1.26) | 0.01 |
| 11 | <i>RIN3</i>    | rs7142236  | 14 | 92081630  | C / T | 0.49 | 1.07 (1.01-1.14) | 0.02 |
| 11 | <i>AP1S3</i>   | rs658055   | 2  | 224425534 | G / A | 0.03 | 1.27 (1.04-1.54) | 0.02 |
| 11 | <i>TOM1</i>    | rs2267332  | 22 | 34048818  | G / C | 0.92 | 1.14 (1.02-1.27) | 0.02 |
| 11 | <i>CLEC10A</i> | rs732428   | 17 | 6909787   | T / C | 0.13 | 1.11 (1.01-1.22) | 0.02 |
| 11 | <i>FNBP1L</i>  | rs6541379  | 1  | 93608786  | A / G | 0.11 | 1.12 (1.01-1.24) | 0.03 |
| 11 | <i>FGF10</i>   | rs6451758  | 5  | 44341272  | T / A | 0.82 | 1.08 (1.01-1.16) | 0.03 |
| 11 | <i>ABCA1</i>   | rs1809924  | 9  | 104894024 | G / C | 0.31 | 1.07 (1.01-1.14) | 0.03 |
| 11 | <i>EPN2</i>    | rs3862148  | 17 | 19109505  | T / G | 0.18 | 1.09 (1.01-1.18) | 0.03 |
| 11 | <i>ADORA1</i>  | rs10800901 | 1  | 199842961 | A / G | 0.32 | 1.07 (1.01-1.14) | 0.03 |
| 11 | <i>AP2A1</i>   | rs10404868 | 19 | 54963736  | T / G | 0.27 | 1.07 (1-1.15)    | 0.04 |
| 11 | <i>M6PR</i>    | rs12423746 | 12 | 9004269   | T / G | 0.47 | 1.06 (1-1.12)    | 0.04 |
| 11 | <i>ELMO2</i>   | rs2297056  | 20 | 44429857  | G / A | 0.08 | 1.13 (1.01-1.27) | 0.04 |
| 11 | <i>MYO7A</i>   | rs2276293  | 11 | 76594868  | G / A | 0.49 | 1.06 (1-1.12)    | 0.04 |
| 11 | <i>ELMO1</i>   | rs1882079  | 7  | 37164506  | C / T | 0.49 | 1.06 (1-1.12)    | 0.04 |
| 11 | <i>DOCK1</i>   | rs11017787 | 10 | 129076888 | T / A | 0.31 | 1.07 (1-1.14)    | 0.05 |
| 11 | <i>RAMP3</i>   | rs2877307  | 7  | 44951531  | A / G | 0.23 | 1.08 (1-1.15)    | 0.05 |
| 11 | <i>ITSN1</i>   | rs9979150  | 21 | 34163750  | A / G | 0.43 | 1.06 (1-1.12)    | 0.05 |
| 11 | <i>SORT1</i>   | rs17585355 | 1  | 109569857 | A / C | 0.94 | 1.12 (1-1.27)    | 0.05 |
| 11 | <i>MSR1</i>    | rs12675898 | 8  | 16223671  | T / C | 0.95 | 1.14 (1-1.3)     | 0.05 |
| 11 | <i>EHD1</i>    | rs17146413 | 11 | 64394617  | T / C | 0.06 | 1.14 (1-1.29)    | 0.06 |
| 11 | <i>GRIA1</i>   | rs545098   | 5  | 152884481 | C / T | 0.72 | 1.06 (1-1.13)    | 0.06 |
| 11 | <i>IGF2R</i>   | rs9295118  | 6  | 160378126 | A / T | 0.87 | 1.08 (1-1.18)    | 0.07 |
| 11 | <i>DNM2</i>    | rs1560734  | 19 | 10702049  | T / C | 0.92 | 1.11 (0.99-1.24) | 0.08 |
| 11 | <i>LRP6</i>    | rs12425946 | 12 | 12302231  | G / A | 0.85 | 1.08 (0.99-1.17) | 0.08 |
| 11 | <i>DNM1L</i>   | rs11052187 | 12 | 32742631  | A / G | 0.09 | 1.11 (0.99-1.24) | 0.09 |
| 11 | <i>PPT1</i>    | rs3131650  | 1  | 40224816  | T / G | 0.29 | 1.06 (0.99-1.13) | 0.10 |
| 11 | <i>RBED1</i>   | rs17026285 | 2  | 85528416  | T / C | 0.77 | 1.06 (0.99-1.13) | 0.10 |
| 11 | <i>TFRC</i>    | rs6583286  | 3  | 197256495 | T / C | 0.97 | 1.14 (0.97-1.34) | 0.11 |
| 11 | <i>LRP12</i>   | rs4461873  | 8  | 105653739 | G / C | 0.79 | 1.06 (0.99-1.13) | 0.11 |
| 11 | <i>AHSG</i>    | rs4498037  | 3  | 187823965 | C / T | 0.75 | 1.05 (0.99-1.12) | 0.11 |
| 11 | <i>APIG1</i>   | rs11645475 | 16 | 70380618  | T / C | 0.95 | 1.11 (0.97-1.27) | 0.12 |
| 11 | <i>CEBPE</i>   | rs4982731  | 14 | 22655173  | T / C | 0.74 | 1.05 (0.99-1.12) | 0.12 |
| 11 | <i>AP3B2</i>   | rs10906984 | 15 | 81163350  | A / C | 0.39 | 1.05 (0.99-1.11) | 0.13 |
| 11 | <i>CUBN</i>    | rs17336427 | 10 | 16968595  | C / G | 0.97 | 1.13 (0.96-1.33) | 0.14 |
| 11 | <i>ZFYVE9</i>  | rs553648   | 1  | 52331911  | A / G | 0.04 | 1.13 (0.96-1.35) | 0.15 |
| 11 | <i>FCN2</i>    | rs6537958  | 9  | 135006768 | C / T | 0.79 | 1.05 (0.98-1.13) | 0.15 |
| 11 | <i>CLEC4F</i>  | rs2110978  | 2  | 70963884  | C / T | 0.67 | 1.05 (0.98-1.11) | 0.16 |
| 11 | <i>ST7</i>     | rs193588   | 7  | 116444721 | C / G | 0.37 | 1.04 (0.98-1.11) | 0.16 |
| 11 | <i>LY75</i>    | rs2292387  | 2  | 160560229 | C / T | 0.83 | 1.06 (0.98-1.14) | 0.16 |
| 11 | <i>ADRB2</i>   | rs11959615 | 5  | 148181509 | A / T | 0.56 | 1.04 (0.98-1.11) | 0.16 |
| 11 | <i>SNX4</i>    | rs7636858  | 3  | 126659411 | G / C | 0.43 | 1.04 (0.98-1.1)  | 0.17 |
| 11 | <i>SNX2</i>    | rs4836196  | 5  | 122092320 | A / C | 0.13 | 1.07 (0.97-1.17) | 0.17 |
| 11 | <i>ELMOD1</i>  | rs7123473  | 11 | 106986661 | A / G | 0.03 | 1.14 (0.94-1.37) | 0.18 |
| 11 | <i>LDLR</i>    | rs1799898  | 19 | 11088554  | C / T | 0.88 | 1.06 (0.97-1.15) | 0.18 |
| 11 | <i>ADORA2A</i> | rs1041749  | 22 | 23170945  | T / C | 0.41 | 1.04 (0.98-1.1)  | 0.18 |

|    |                |            |    |           |       |      |                  |      |
|----|----------------|------------|----|-----------|-------|------|------------------|------|
| 11 | <i>PICALM</i>  | rs3894654  | 11 | 85529106  | T / A | 0.06 | 1.09 (0.96-1.24) | 0.18 |
| 11 | <i>MYO6</i>    | rs10943282 | 6  | 76512109  | G / T | 0.18 | 1.05 (0.98-1.14) | 0.18 |
| 11 | <i>APP</i>     | rs2409168  | 21 | 26495816  | T / G | 0.94 | 1.08 (0.96-1.21) | 0.19 |
| 11 | <i>DNM1</i>    | rs7875406  | 9  | 128050572 | A / G | 0.96 | 1.09 (0.96-1.23) | 0.20 |
| 11 | <i>RAB5A</i>   | rs4241540  | 3  | 19957976  | G / C | 0.63 | 1.04 (0.98-1.1)  | 0.21 |
| 11 | <i>LRP1</i>    | rs4759277  | 12 | 55819957  | C / A | 0.65 | 1.04 (0.98-1.1)  | 0.21 |
| 11 | <i>AMPH</i>    | rs10278233 | 7  | 38415143  | T / C | 0.83 | 1.05 (0.97-1.13) | 0.22 |
| 11 | <i>VAV1</i>    | rs2546133  | 19 | 6750677   | T / C | 0.11 | 1.07 (0.96-1.2)  | 0.22 |
| 11 | <i>LRP2</i>    | rs11887007 | 2  | 169975361 | A / C | 0.61 | 1.04 (0.98-1.1)  | 0.23 |
| 11 | <i>APIB1</i>   | rs2267138  | 22 | 28118195  | G / A | 0.13 | 1.05 (0.97-1.14) | 0.24 |
| 11 | <i>SFTPD</i>   | rs4255480  | 10 | 81725868  | C / T | 0.04 | 1.11 (0.93-1.33) | 0.25 |
| 11 | <i>ELMOD2</i>  | rs2874478  | 4  | 141761994 | A / G | 0.21 | 1.04 (0.97-1.12) | 0.25 |
| 11 | <i>APIG2</i>   | rs12897422 | 14 | 23102867  | A / G | 0.16 | 1.05 (0.97-1.14) | 0.26 |
| 11 | <i>SYNJ1</i>   | rs845007   | 21 | 32953744  | A / G | 0.06 | 1.08 (0.94-1.25) | 0.27 |
| 11 | <i>LRP1B</i>   | rs10190295 | 2  | 142309956 | T / C | 0.36 | 1.03 (0.97-1.1)  | 0.28 |
| 11 | <i>NPC1</i>    | rs2435307  | 18 | 19381908  | C / T | 0.55 | 1.03 (0.97-1.09) | 0.28 |
| 11 | <i>COLEC12</i> | rs2341746  | 18 | 495472    | T / G | 0.80 | 1.04 (0.97-1.11) | 0.29 |
| 11 | <i>VLDLR</i>   | rs10966485 | 9  | 2480339   | C / T | 0.06 | 1.07 (0.94-1.23) | 0.30 |
| 11 | <i>LRP10</i>   | rs10132585 | 14 | 22399286  | T / C | 0.37 | 1.03 (0.97-1.1)  | 0.30 |
| 11 | <i>EPN1</i>    | rs11882031 | 19 | 60885474  | T / C | 0.91 | 1.06 (0.95-1.17) | 0.30 |
| 11 | <i>ITSN2</i>   | rs2702042  | 2  | 24458193  | T / C | 0.37 | 1.03 (0.97-1.1)  | 0.30 |
| 11 | <i>ANKFY1</i>  | rs16953766 | 17 | 4019456   | A / G | 0.02 | 1.11 (0.91-1.34) | 0.30 |
| 11 | <i>RAC1</i>    | rs10234438 | 7  | 6196040   | A / G | 0.97 | 1.09 (0.92-1.28) | 0.31 |
| 11 | <i>CAP1</i>    | rs16826852 | 1  | 40200187  | G / A | 0.09 | 1.05 (0.95-1.16) | 0.31 |
| 11 | <i>LRP8</i>    | rs2027261  | 1  | 53531047  | A / G | 0.68 | 1.03 (0.97-1.1)  | 0.32 |
| 11 | <i>FNBP1</i>   | rs10119739 | 9  | 129770167 | G / A | 0.86 | 1.04 (0.96-1.13) | 0.33 |
| 11 | <i>RABEP1</i>  | rs2251155  | 17 | 5139824   | T / C | 0.52 | 1.03 (0.97-1.09) | 0.35 |
| 11 | <i>APIGBP1</i> | rs11870876 | 17 | 33007030  | T / C | 0.83 | 1.03 (0.96-1.11) | 0.42 |
| 11 | <i>EEA1</i>    | rs6538379  | 12 | 91979163  | G / A | 0.44 | 1.02 (0.97-1.08) | 0.45 |
| 11 | <i>LDLRAP1</i> | rs4075441  | 1  | 25591233  | A / G | 0.76 | 1.03 (0.96-1.1)  | 0.48 |
| 11 | <i>EPS15L1</i> | rs10410427 | 19 | 16416985  | G / A | 0.85 | 1.03 (0.95-1.11) | 0.48 |
| 11 | <i>LMBR1L</i>  | rs10783302 | 12 | 47784397  | T / G | 0.36 | 1.02 (0.96-1.08) | 0.49 |
| 11 | <i>DNER</i>    | rs10933307 | 2  | 230346805 | G / T | 0.46 | 1.02 (0.96-1.08) | 0.52 |
| 11 | <i>RAB18</i>   | rs717287   | 10 | 27819196  | T / G | 0.75 | 1.02 (0.96-1.09) | 0.53 |
| 11 | <i>DBNL</i>    | rs7793194  | 7  | 43860511  | T / C | 0.23 | 1.02 (0.96-1.09) | 0.54 |
| 11 | <i>RAB22A</i>  | rs1537479  | 20 | 56260074  | C / T | 0.47 | 1.02 (0.96-1.08) | 0.54 |
| 11 | <i>PACSIN3</i> | rs7937410  | 11 | 47162658  | G / C | 0.23 | 1.02 (0.96-1.09) | 0.58 |
| 11 | <i>FCN1</i>    | rs11103623 | 9  | 135112990 | T / C | 0.60 | 1.02 (0.96-1.08) | 0.58 |
| 11 | <i>CD14</i>    | rs2569192  | 5  | 139995392 | C / G | 0.29 | 1.02 (0.96-1.08) | 0.59 |
| 11 | <i>PLD2</i>    | rs2286672  | 17 | 4659581   | T / C | 0.07 | 1.03 (0.93-1.13) | 0.60 |
| 11 | <i>CLINT1</i>  | rs10476226 | 5  | 157393065 | A / G | 0.07 | 1.03 (0.93-1.14) | 0.60 |
| 11 | <i>ASGR2</i>   | rs12951306 | 17 | 6961231   | C / T | 0.48 | 1.02 (0.96-1.08) | 0.60 |
| 11 | <i>LRP3</i>    | rs8101468  | 19 | 38372622  | C / A | 0.76 | 1.02 (0.95-1.09) | 0.63 |
| 11 | <i>RABGEF1</i> | rs2707856  | 7  | 65655160  | A / T | 0.54 | 1.01 (0.96-1.07) | 0.68 |
| 11 | <i>SNX3</i>    | rs217132   | 6  | 108662892 | G / A | 0.94 | 1.02 (0.91-1.14) | 0.70 |
| 11 | <i>TRIP10</i>  | rs184628   | 19 | 6698394   | A / C | 0.80 | 1.01 (0.94-1.09) | 0.72 |
| 11 | <i>HFE</i>     | rs707889   | 6  | 26203910  | A / G | 0.23 | 1.01 (0.95-1.09) | 0.72 |
| 11 | <i>LRP4</i>    | rs7112060  | 11 | 46848477  | T / C | 0.08 | 1.02 (0.92-1.13) | 0.73 |

|    |                |            |    |           |       |      |                  |      |
|----|----------------|------------|----|-----------|-------|------|------------------|------|
| 11 | <i>RASSF4</i>  | rs7903148  | 10 | 44723477  | G / A | 0.14 | 1.01 (0.92-1.1)  | 0.85 |
| 11 | <i>CLTCL1</i>  | rs2800973  | 22 | 17543170  | C / T | 0.65 | 1.01 (0.94-1.07) | 0.86 |
| 11 | <i>NECAP1</i>  | rs11057123 | 12 | 8122982   | C / G | 0.64 | 1.01 (0.94-1.07) | 0.88 |
| 11 | <i>MFGE8</i>   | rs1850324  | 15 | 87273271  | C / T | 0.40 | 1 (0.95-1.06)    | 0.89 |
| 11 | <i>AP2A2</i>   | rs7394783  | 11 | 995108    | A / G | 0.46 | 1 (0.95-1.06)    | 0.89 |
| 11 | <i>CBL</i>     | rs7113047  | 11 | 118613322 | A / G | 0.73 | 1 (0.94-1.07)    | 0.89 |
| 11 | <i>CLN3</i>    | rs151181   | 16 | 28398018  | C / T | 0.41 | 1 (0.95-1.07)    | 0.90 |
| 11 | <i>PACIN2</i>  | rs5996250  | 22 | 41678832  | C / T | 0.08 | 1.01 (0.91-1.11) | 0.91 |
| 11 | <i>TSC2</i>    | rs2516737  | 16 | 2041750   | G / A | 0.92 | 1.01 (0.9-1.12)  | 0.91 |
| 11 | <i>AP1S1</i>   | rs4727480  | 7  | 100393008 | A / G | 0.46 | 1 (0.95-1.06)    | 0.91 |
| 11 | <i>ASGR1</i>   | rs4464125  | 17 | 6991999   | G / A | 0.77 | 1 (0.94-1.07)    | 0.92 |
| 11 | <i>ARF6</i>    | rs11849760 | 14 | 49462470  | A / G | 0.90 | 1 (0.92-1.1)     | 0.93 |
| 11 | <i>CLEC7A</i>  | rs11053608 | 12 | 10166951  | G / T | 0.55 | 1 (0.94-1.06)    | 0.94 |
| 11 | <i>NEDD4L</i>  | rs17064520 | 18 | 54060610  | T / C | 0.15 | 1 (0.93-1.09)    | 0.95 |
| 11 | <i>ATP6V1H</i> | rs7008117  | 8  | 54747208  | A / C | 0.22 | 1 (0.94-1.07)    | 0.99 |
| 12 | <i>FGF9</i>    | rs7995502  | 13 | 21310584  | T / C | 0.07 | 1.19 (1.03-1.37) | 0.02 |
| 12 | <i>LHCGR</i>   | rs2956355  | 2  | 48892026  | G / A | 0.92 | 1.16 (1.02-1.32) | 0.03 |
| 12 | <i>MKKS</i>    | rs6514111  | 20 | 10331981  | G / A | 0.14 | 1.1 (1.01-1.2)   | 0.03 |
| 12 | <i>SRD5A2</i>  | rs564310   | 2  | 31803993  | G / A | 0.51 | 1.06 (1-1.12)    | 0.04 |
| 12 | <i>DMRT1</i>   | rs6477322  | 9  | 862418    | C / T | 0.89 | 1.11 (1-1.22)    | 0.04 |
| 12 | <i>WNT4</i>    | rs4654792  | 1  | 22345978  | G / C | 0.78 | 1.07 (1-1.15)    | 0.04 |
| 12 | <i>NR5A1</i>   | rs7852843  | 9  | 124313377 | C / T | 0.48 | 1.05 (1-1.12)    | 0.07 |
| 12 | <i>FSHR</i>    | rs17037707 | 2  | 49009826  | A / T | 0.88 | 1.08 (0.99-1.18) | 0.09 |
| 12 | <i>DMRT2</i>   | rs1509186  | 9  | 1085922   | G / A | 0.84 | 1.07 (0.99-1.15) | 0.09 |
| 12 | <i>WT1</i>     | rs6484562  | 11 | 32246470  | G / T | 0.76 | 1.06 (0.99-1.14) | 0.09 |
| 12 | <i>OSR1</i>    | rs4666485  | 2  | 19514913  | T / G | 0.20 | 1.06 (0.99-1.14) | 0.11 |
| 12 | <i>ANKRD7</i>  | rs41943    | 7  | 117554924 | C / T | 0.50 | 1.05 (0.99-1.11) | 0.11 |
| 12 | <i>SOX9</i>    | rs11077598 | 17 | 67786460  | A / G | 0.38 | 1.04 (0.98-1.1)  | 0.19 |
| 12 | <i>FST</i>     | rs4865763  | 5  | 52632147  | G / A | 0.51 | 1.04 (0.98-1.1)  | 0.22 |
| 12 | <i>RXFP2</i>   | rs9548957  | 13 | 31225091  | G / A | 0.27 | 1.04 (0.97-1.11) | 0.28 |
| 12 | <i>NCOA4</i>   | rs11597667 | 10 | 51256520  | T / A | 0.87 | 1.04 (0.96-1.13) | 0.29 |
| 12 | <i>FANCA</i>   | rs12599180 | 16 | 88366807  | A / G | 0.61 | 1.02 (0.96-1.08) | 0.46 |
| 12 | <i>MIF</i>     | rs5751761  | 22 | 22568290  | T / C | 0.56 | 1.02 (0.96-1.08) | 0.54 |
| 12 | <i>HMGCR</i>   | rs3761740  | 5  | 74667889  | A / C | 0.10 | 1.02 (0.93-1.12) | 0.73 |
| 12 | <i>CSDE1</i>   | rs6668128  | 1  | 114976031 | A / G | 0.24 | 1 (0.94-1.07)    | 0.98 |

Pathway IDs are as follows: 1. Olfactory transduction 2. Organic acid biosynthetic process 3. Regulation of Wnt receptor signaling pathway 4. Odontogenesis 5. Aminoglycan metabolic process 6. Membrane invagination 7. Calcium-dependent cell-cell adhesion 8. Galactose metabolism 9. ALK in cardiac myocytes 10. Biomineral formation 11. Endocytosis 12. Gonad development

Allele freq is based on WTCCC case samples. Three Study P-values are from the imputed meta-analysis of WTCCC, DGI, FUSION cohorts, produced by DIAGRAM consortium. SNP and gene positions are based on NCBI Build 35. Alleles are based on the forward strand.

**Supplementary Table 3:** The 18 confirmed gene loci in type 2 diabetes

| <b>Gene</b>               | <b>Current evidence (p value)</b> | <b>Odds ratio (per allele)</b> | <b>RAF (UK)</b> |
|---------------------------|-----------------------------------|--------------------------------|-----------------|
| <i>TCF7L2</i>             | 1x10 <sup>-48</sup>               | 1.37 (1.31-1.43)               | 0.31            |
| <i>CDKN2A / 2B</i>        | 8x10 <sup>-15</sup>               | 1.20 (1.14-1.25)               | 0.83            |
| <i>FTO</i>                | 1x10 <sup>-12</sup>               | 1.17 (1.12-1.22)               | 0.4             |
| <i>SLC30A8</i>            | 1x10 <sup>-19</sup>               | 1.15 (1.12-1.19)               | 0.69            |
| <i>THADA</i>              | 1x10 <sup>-9</sup>                | 1.15 (1.10-1.20)               | 0.9             |
| <i>HHEX / IDE / KIF11</i> | 7x10 <sup>-17</sup>               | 1.15 (1.10-1.19)               | 0.65            |
| <i>IGF2BP2</i>            | 9x10 <sup>-16</sup>               | 1.14 (1.11-1.18)               | 0.32            |
| <i>CDKAL1</i>             | 2x10 <sup>-18</sup>               | 1.14 (1.11-1.17)               | 0.32            |
| <i>KCNJ11</i>             | 5x10 <sup>-11</sup>               | 1.14 (1.10-1.19)               | 0.35            |
| <i>PPARG</i>              | 2x10 <sup>-6</sup>                | 1.14 (1.08-1.20)               | 0.87            |
| <i>NOTCH2</i>             | 4x10 <sup>-8</sup>                | 1.13 (1.08-1.17)               | 0.10            |
| <i>WFS1</i>               | 4x10 <sup>-11</sup>               | 1.12 (1.09 - 1.15)             | 0.6             |
| <i>CDC123 / CAMK1D</i>    | 1x10 <sup>-10</sup>               | 1.11 (1.07-1.14)               | 0.18            |
| <i>TCF2</i>               | 8x10 <sup>-10</sup>               | 1.10 (1.07-1.14)               | 0.47            |
| <i>JAZF1</i>              | 5x10 <sup>-14</sup>               | 1.10 (1.07-1.13)               | 0.5             |
| <i>TSPAN8 / LGR5</i>      | 1x10 <sup>-9</sup>                | 1.09 (1.06-1.12)               | 0.27            |
| <i>ADAMTS9</i>            | 1x10 <sup>-8</sup>                | 1.09 (1.06-1.12)               | 0.76            |
| <i>MC4R</i>               | 0.003                             | 1.09 (1.03-1.15)               | 0.24            |

18 Gene loci, 4 of which have a number of possible genes implicated. Approximate P values and odds ratios calculated by meta-analysis of published GWA study ORs, adapted from: Frayling TM. Genome-wide association studies provide new insights into type 2 diabetes aetiology. *Nat Rev Genet* 2007;8:657-662. RAF: Risk Allele Frequency (based on WTCCC). Possible genes determined by recombination windows surrounding the highest associated SNP from published GWA studies.
